# Supplementary material
Source: PubMed Central journal article supplement (PMC2920067)

3mo of age

## a Ad lib glucose

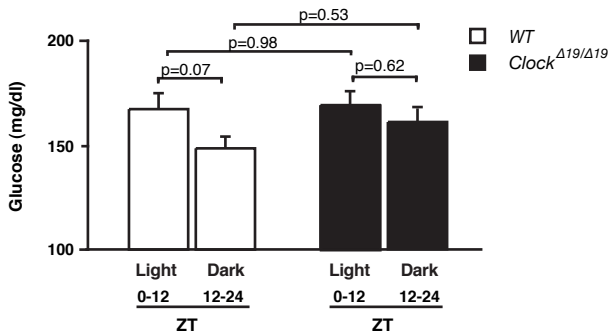

## b Ad lib insulin

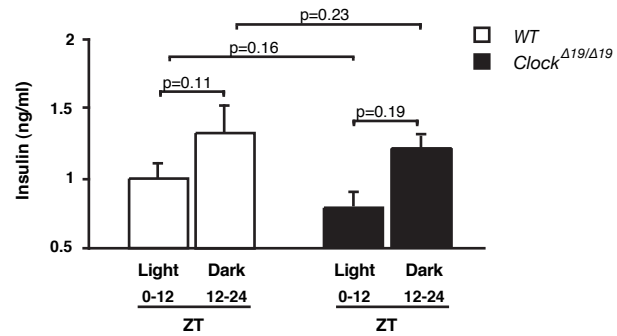

## c Glucose tolerance test - glucose levels (ZT2)

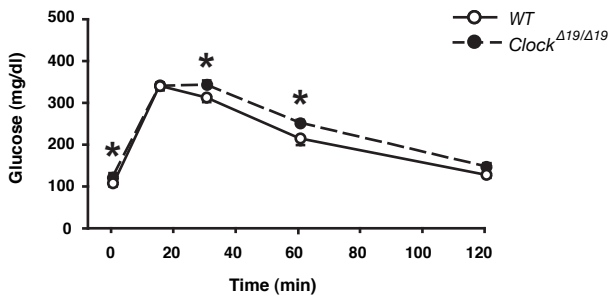

## d Glucose tolerance test - glucose levels (ZT14)

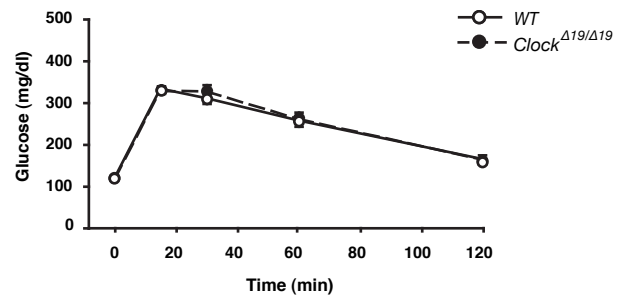

## e Insulin tolerance test (ZT2)

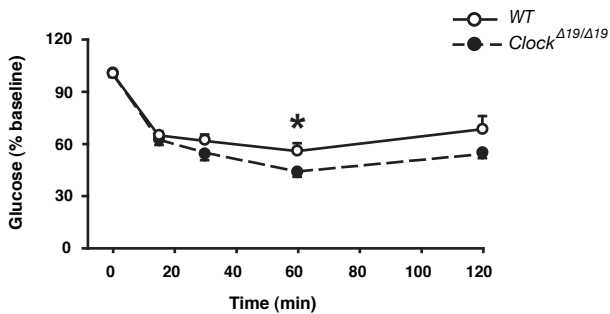

## f Insulin tolerance test (ZT14)

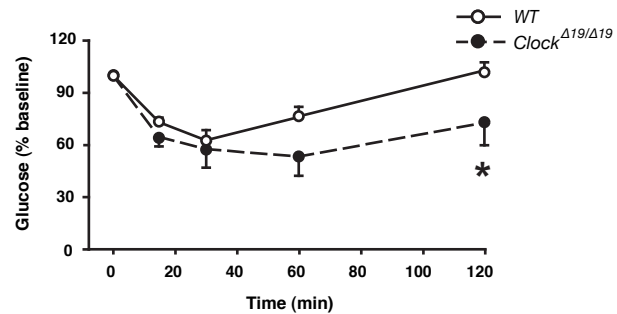

## g Islet glucose stimulated insulin release

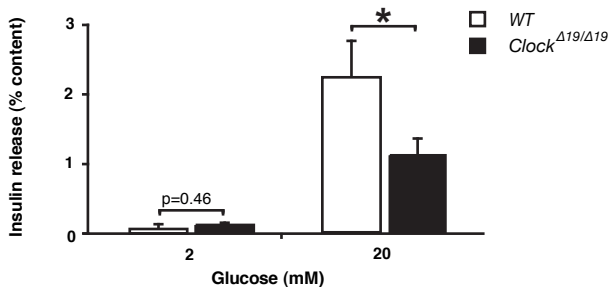

Supplement: NIHMS213096-supplement-5.pdf [file NIHMS213096-supplement-5.pdf]
