# Supplementary material
Source: PubMed Central journal article supplement (PMC2920067)

## a Pancreas morphology

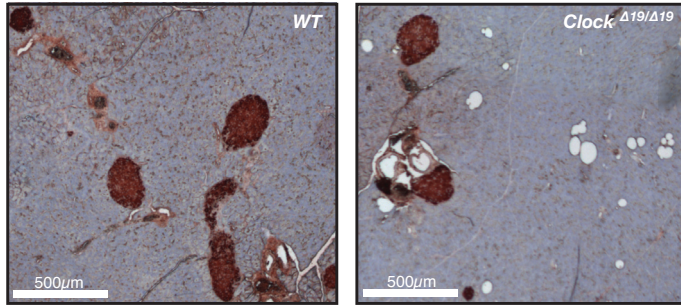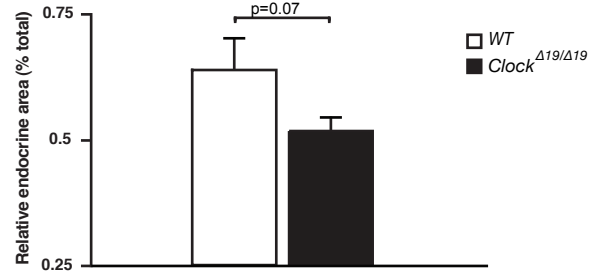

## b Pancreas insulin content

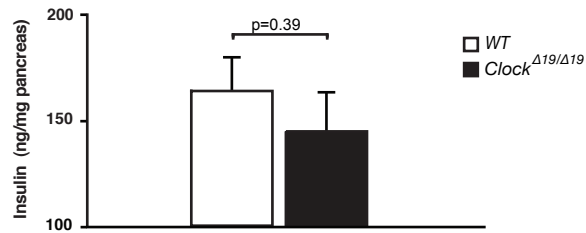

## c Islet apoptosis

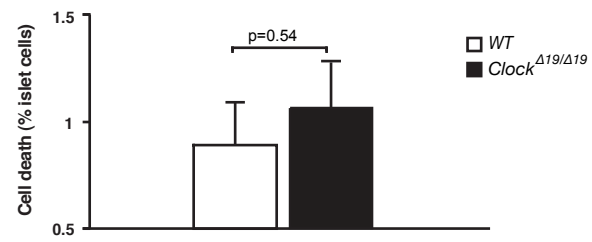

## d Islet insulin secretion - Ca<sup>2+</sup> influx - WT

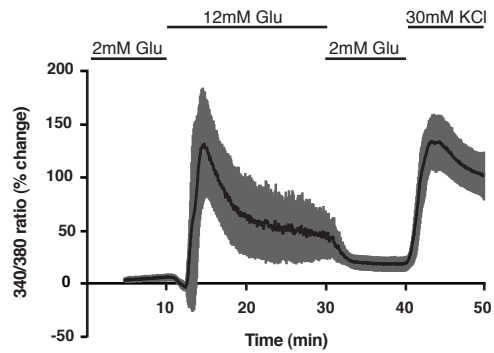

## e Islet insulin secretion - Ca<sup>2+</sup> influx - *Clock*<sup>Δ19/Δ19</sup>

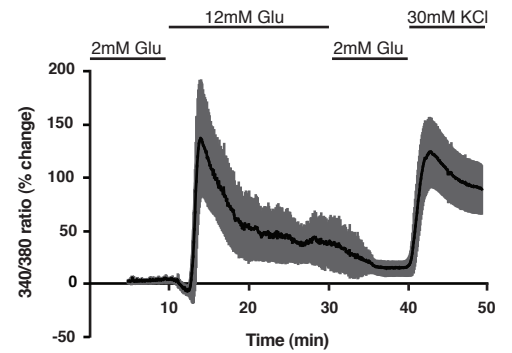

Supplement: NIHMS213096-supplement-6.pdf [file NIHMS213096-supplement-6.pdf]
