# Supplementary material
Source: PubMed Central journal article supplement (PMC2920067)

**a** Total number of genes changed (microarray)

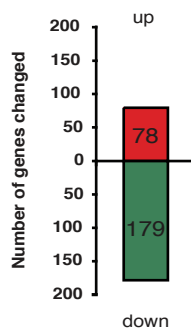

**c** Microarray data validation by real time PCR

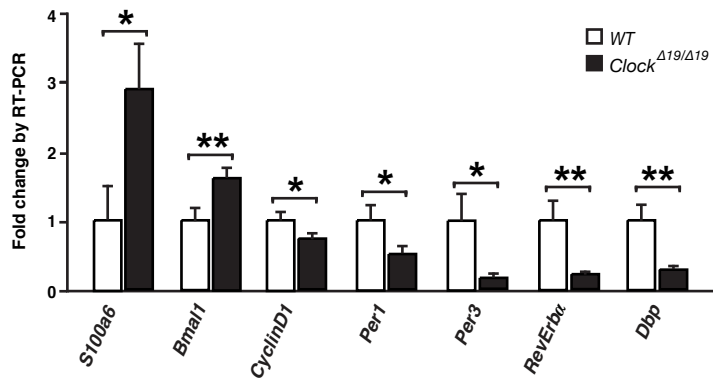

**b** Altered gene expression (microarray)

| Symbol           | Fold change | Function          |
|------------------|-------------|-------------------|
| <i>S100a6</i>    | 2.4         | apoptosis         |
| <i>Bmal1</i>     | 1.8         | circadian         |
| <i>p21</i>       | 1.8         | apoptosis         |
| <i>Atf3</i>      | 1.7         | apoptosis         |
| <i>Bik</i>       | 1.5         | apoptosis         |
| <i>Tgln1</i>     | -1.4        | vesicle transport |
| <i>Rab9b</i>     | -1.4        | vesicle transport |
| <i>Pfkfb3</i>    | -1.4        | cell cycle        |
| <i>Wnk1</i>      | -1.4        | vesicle transport |
| <i>Per3</i>      | -1.6        | circadian         |
| <i>Per1</i>      | -1.7        | circadian         |
| <i>Cyclin D1</i> | -1.6        | proliferation     |
| <i>RevErbα</i>   | -1.8        | circadian         |
| <i>Neu2</i>      | -1.9        | differentiation   |
| <i>Tef</i>       | -2.0        | metabolism        |
| <i>Pak3</i>      | -2.5        | proliferation     |
| <i>DBP</i>       | -3.2        | metabolism        |

**d** Major functional groups changed on microarray (gene ontology analysis)

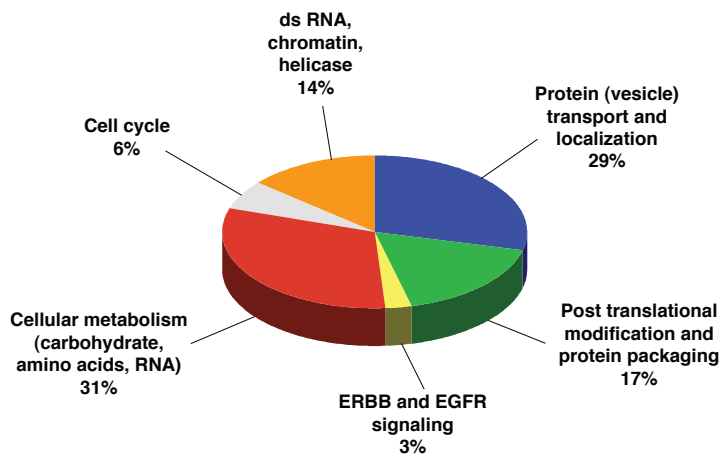

Supplement: NIHMS213096-supplement-7.pdf [file NIHMS213096-supplement-7.pdf]
