# Supplementary material
Source: PubMed Central journal article supplement (PMC2920067)
Supplement: NIHMS213096-supplement-11.pdf [file NIHMS213096-supplement-11.pdf]

Table 1

| Illumina ID  | Symbol        | Definition                                                                       | Mean Clock | Mean WT | P-value | Fold Change | Accession Number | Synonyms                                                                    |
|--------------|---------------|----------------------------------------------------------------------------------|------------|---------|---------|-------------|------------------|-----------------------------------------------------------------------------|
| ILMN_2616226 | Dbp           | Mus musculus D site albumin promoter binding protein (Dbp), mRNA                 | 695        | 2216    | 0.00172 | -3.2        | NM_016974.1      |                                                                             |
| ILMN_1246194 | LOC667370     | PREDICTED: Mus musculus similar to interferon-induced protein with tetratricopep | 292        | 747     | 0.01561 | -2.6        | XM_001480084.1   |                                                                             |
| ILMN_1216639 | Pak3          | Mus musculus p21 (CDKN1A)-activated kinase 3 (Pak3), mRNA                        | 482        | 1225    | 0.01657 | -2.5        | NM_008778.2      | mPAK-3; Pak65beta; PAK-3; Stk4; Pak65alpha                                  |
| ILMN_1229091 | LOC100047427  | PREDICTED: Mus musculus similar to thyroid hormone receptor (LOC100047427), mRNA | 348        | 864     | 0.02254 | -2.5        | XM_001478949.1   |                                                                             |
| ILMN_2644381 | A930034L06Rik | Mus musculus RIKEN cDNA A930034L06 gene (A930034L06Rik), mRNA                    | 136        | 337     | 0.00095 | -2.5        | NM_175692.3      | E130013N09Rik; AL022637; AW319638; RP23-132A3.1; AI854265                   |
| ILMN_2767871 | Pdyn          | Mus musculus prodynorphin (Pdyn), mRNA                                           | 1913       | 4736    | 0.00456 | -2.5        | NM_018863.2      | Dyn                                                                         |
| ILMN_2690064 | Hnrpd1        | Mus musculus heterogeneous nuclear ribonucleoprotein D-like (Hnrpd1), mRNA       | 1130       | 2620    | 0.00051 | -2.3        | NM_016690.2      | hnRNP-DL; AA407431; JKTBP; D5Erdt650e; D5Wsu145e; AA959857                  |
| ILMN_1230458 | Ifit3         | Mus musculus interferon-induced protein with tetratricopeptide repeats 3 (Ifit3) | 315        | 716     | 0.02152 | -2.3        | NM_010501.2      | Ifi49; MGC107331                                                            |
| ILMN_1225985 | Serpina7      | Mus musculus serine (or cysteine) peptidase inhibitor, clade A (alpha-1 antiprot | 509        | 1144    | 0.00573 | -2.2        | NM_177920.4      | TBG; C730040N12Rik                                                          |
| ILMN_1216091 | Wipi1         | Mus musculus WD repeat domain, phosphoinositide interacting 1 (Wipi1), mRNA      | 188        | 420     | 0.00042 | -2.2        | NM_145940.2      | MGC36476; AW411817; D11Erdt498e; 4930533H01Rik                              |
| ILMN_2658582 | Rgs17         | Mus musculus regulator of G-protein signaling 17 (Rgs17), mRNA                   | 341        | 743     | 0.00453 | -2.2        | NM_019958.3      | Rgsz2; 6430507P11Rik                                                        |
| ILMN_2667597 | Ifit2         | Mus musculus interferon-induced protein with tetratricopeptide repeats 2 (Ifit2) | 157        | 340     | 0.00205 | -2.2        | NM_008332.2      | Ifi54; AV302338                                                             |
| ILMN_1250001 | 4930583H14Rik | Mus musculus RIKEN cDNA 4930583H14 gene (4930583H14Rik), mRNA                    | 66         | 141     | 0.04173 | -2.1        | NM_026358.2      | AI195347; Osap                                                              |
| ILMN_1219749 | Tnfrsf22      | Mus musculus tumor necrosis factor receptor superfamily, member 22 (Tnfrsf22)    | 1048       | 2211    | 0.00590 | -2.1        | NM_023680.3      | Tnfrh2; Tnfrsf1a12; 2810028K06Rik; SOBa; mDcTrailr2; C130035G06Rik          |
| ILMN_1223511 | C230071H18Rik | Mus musculus RIKEN cDNA C230071H18 gene (C230071H18Rik), mRNA                    | 83         | 172     | 0.00324 | -2.1        | NM_207265.2      |                                                                             |
| ILMN_2667203 | Rgs11         | Mus musculus regulator of G-protein signaling 11 (Rgs11), mRNA                   | 592        | 1225    | 0.01477 | -2.1        | NM_001081069.1   | C78048                                                                      |
| ILMN_2685543 | Car15         | Mus musculus carbonic anhydrase 15 (Car15), mRNA                                 | 1538       | 3181    | 0.00088 | -2.1        | NM_030558.2      | Cals2; AI315043                                                             |
| ILMN_1244513 | Gbp3          | Mus musculus guanylate nucleotide binding protein 3 (Gbp3), mRNA                 | 667        | 1369    | 0.01026 | -2.1        | NM_018734.3      | Gbp4; AW228655                                                              |
| ILMN_1213337 | Zcchc12       | Mus musculus zinc finger, CCHC domain containing 12 (Zcchc12), mRNA              | 192        | 392     | 0.01459 | -2.0        | NM_028325.2      | AV136720; 2810028A01Rik                                                     |
| ILMN_2454204 | Tnfrsf22      |                                                                                  | 922        | 1881    | 0.00545 | -2.0        | NM_023680        |                                                                             |
| ILMN_1258676 | Tef           | Mus musculus thyrotroph embryonic factor (Tef), transcript variant 1, mRNA       | 1114       | 2251    | 0.00196 | -2.0        | NM_017376.2      | 2310028D20Rik                                                               |
| ILMN_1237990 | Gale          | Mus musculus galactose-4-epimerase, UDP (Gale), mRNA                             | 475        | 945     | 0.02761 | -2.0        | NM_178389.3      | AI323962; 2310002A12Rik                                                     |
| ILMN_2758622 | EG329763      | Mus musculus predicted gene, EG329763 (EG329763), mRNA                           | 83         | 164     | 0.00356 | -2.0        | NM_177860.3      | D830013H12                                                                  |
| ILMN_1245389 | LOC236604     | Mus musculus phosphatidylserine decarboxylase pseudogene (LOC236604)             | 337        | 652     | 0.01294 | -1.9        | NR_003517.1      |                                                                             |
| ILMN_2769930 | Gm1631        |                                                                                  | 95         | 180     | 0.04637 | -1.9        | NM_201366        |                                                                             |
| ILMN_1243921 | 5330431K02Rik |                                                                                  | 273        | 513     | 0.02605 | -1.9        | NM_026606.1      |                                                                             |
| ILMN_2687040 | Echdc2        | Mus musculus enoyl Coenzyme A hydratase domain containing 2 (Echdc2), mRNA       | 169        | 314     | 0.00036 | -1.9        | NM_026728.2      | 2610009M20Rik; D4Erdt765e; 1300017C12Rik                                    |
| ILMN_1244123 | Slc38a2       | Mus musculus solute carrier family 38, member 2 (Slc38a2), mRNA                  | 1223       | 2272    | 0.00315 | -1.9        | NM_175121.3      | mKIAA1382; SAT2; 5033402L14Rik; AI316867; ATA2                              |
| ILMN_2662728 | Neu2          | Mus musculus neuraminidase 2 (Neu2), mRNA                                        | 95         | 176     | 0.00018 | -1.9        | NM_015750.2      | MTS; MSS; MBS                                                               |
| ILMN_2643455 | Trabd         | Mus musculus TraB domain containing (Trabd), mRNA                                | 374        | 682     | 0.02260 | -1.8        | NM_026485.2      | AL023039; 5730502D15Rik                                                     |
| ILMN_2749669 | Nr1d1         | Mus musculus nuclear receptor subfamily 1, group D, member 1 (Nr1d1), mRNA       | 194        | 352     | 0.03295 | -1.8        | NM_145434.3      | AS30070C09Rik; R75201                                                       |
| ILMN_1248099 | Col16a1       | Mus musculus procollagen, type XVI, alpha 1 (Col16a1), mRNA                      | 248        | 450     | 0.02421 | -1.8        | NM_028266.4      | AS30052M23Rik; 2700007F12Rik; CA1F; AI838662                                |
| ILMN_1256257 | LOC100038882  | PREDICTED: Mus musculus hypothetical protein LOC100038882 (LOC100038882), mRNA   | 449        | 814     | 0.00813 | -1.8        | XM_001471686.1   |                                                                             |
| ILMN_2620406 | Nptx2         | Mus musculus neuronal pentraxin 2 (Nptx2), mRNA                                  | 149        | 267     | 0.00361 | -1.8        | NM_016789.2      | Narp; np2                                                                   |
| ILMN_1218923 | LOC100041932  | PREDICTED: Mus musculus hypothetical protein LOC100041932 (LOC100041932), mRNA   | 141        | 251     | 0.00263 | -1.8        | XM_001477842.1   |                                                                             |
| ILMN_1243928 | Npy           | Mus musculus neuropeptide Y (Npy), mRNA                                          | 173        | 307     | 0.01328 | -1.8        | NM_023456.2      | 0710005A05Rik                                                               |
| ILMN_2602881 | 5330439M10Rik |                                                                                  | 250        | 441     | 0.00052 | -1.8        | NM_183132.1      |                                                                             |
| ILMN_2645433 | E330018D03Rik | Mus musculus RIKEN cDNA E330018D03 gene (E330018D03Rik), mRNA                    | 127        | 223     | 0.00037 | -1.8        | NM_177133.2      | FLJ10126                                                                    |
| ILMN_2597899 | Ccdc131       | Mus musculus coiled-coil domain containing 131 (Ccdc131), mRNA, XM_925322        | 501        | 876     | 0.00372 | -1.7        | NM_001033261.2   | BC033596; Psrc2                                                             |
| ILMN_1249670 | Pdia4         | Mus musculus protein disulfide isomerase associated 4 (Pdia4), mRNA              | 1324       | 2285    | 0.00311 | -1.7        | NM_009787.2      | Erp72; AI987846; Cai                                                        |
| ILMN_2643915 | Etv1          | Mus musculus ets variant gene 1 (Etv1), mRNA                                     | 209        | 358     | 0.04406 | -1.7        | NM_007960.3      | Etsrp81; ER81                                                               |
| ILMN_2428301 | Clk1          | Mus musculus CDC-like kinase 1 (Clk1), transcript variant 1, mRNA                | 1098       | 1880    | 0.02561 | -1.7        | NM_001042634.1   | STY                                                                         |
| ILMN_2615312 | Ntn2          | Mus musculus netrin 2-like (chicken) (Ntn2), mRNA                                | 171        | 289     | 0.00655 | -1.7        | NM_010947.3      | Ntn3                                                                        |
| ILMN_2599374 | Fndc3a        | Mus musculus fibronectin type III domain containing 3a (Fndc3a), mRNA            | 415        | 698     | 0.00029 | -1.7        | NM_207636.2      | D14Erdt453e; Fndc3; 1700094E19Rik; sys; F730017H24Rik                       |
| ILMN_1221852 | Tmem118       | Mus musculus transmembrane protein 118 (Tmem118), mRNA                           | 456        | 766     | 0.03699 | -1.7        | NM_172998.2      | AW049082; B830028P19Rik                                                     |
| ILMN_1213911 | Ccdc84        | Mus musculus coiled-coil domain containing 84 (Ccdc84), mRNA                     | 223        | 374     | 0.00692 | -1.7        | NM_201372.3      | Gm1114; D630044F24Rik; MGC106805                                            |
| ILMN_1216015 | Gmpps         | Mus musculus GDP-mannose pyrophosphorylase 4 (Gmpps), mRNA                       | 1293       | 2159    | 0.00742 | -1.7        | NM_133708.3      | 1810012N01Rik                                                               |
| ILMN_1247920 | Per1          | Mus musculus period homolog 1 (Drosophila) (Per1), mRNA                          | 173        | 288     | 0.00430 | -1.7        | NM_011065.3      | MGC102121; Per; mPer1; m-rigui                                              |
| ILMN_2741754 | Jam2          | Mus musculus junction adhesion molecule 2 (Jam2), mRNA                           | 154        | 256     | 0.02102 | -1.7        | NM_023844.4      | AU016127; 2410167M24Rik; JAM-B; VE-JAM; 1110002N23Rik; 2410030G21Rik; JAM-2 |
| ILMN_2628822 | Oas1g         | Mus musculus 2'-5' oligoadenylate synthetase 1G (Oas1g), mRNA                    | 309        | 514     | 0.01825 | -1.7        | NM_011852.2      | Oas1a; Oias1; L2; AI449562; Oias-1; Mmu-L; Mmu-L2                           |
| ILMN_2765407 | Luc7l2        | Mus musculus LUC7-like 2 (S. cerevisiae) (Luc7l2), mRNA                          | 402        | 667     | 0.00125 | -1.7        | NM_138680.1      | CGI-74; AA522013; 4930471C18Rik; Cgi74; CGI-59; AU015269                    |
| ILMN_1239270 | Inha          | Mus musculus inhibin alpha (Inha), mRNA                                          | 125        | 207     | 0.00111 | -1.7        | NM_010564.4      | AW555078                                                                    |
| ILMN_2609014 | Per3          | Mus musculus period homolog 3 (Drosophila) (Per3), mRNA                          | 54         | 89      | 0.00037 | -1.6        | NM_011067.2      | mPer3; 2810049O06Rik                                                        |
| ILMN_1228206 | Dcx           | Mus musculus doublecortin (Dcx), mRNA                                            | 160        | 264     | 0.02380 | -1.6        | NM_010025.2      | Dbct                                                                        |
| ILMN_1224855 | Samd9l        | PREDICTED: Mus musculus sterile alpha motif domain containing 9-like, transcript | 817        | 1344    | 0.03890 | -1.6        | XM_620286.3      |                                                                             |
| ILMN_1250689 | Rgs9          | Mus musculus regulator of G-protein signaling 9 (Rgs9), mRNA                     | 1405       | 2310    | 0.02289 | -1.6        | NM_011268.2      | RGS9-1; MGC150268; MGC150267; Rgs9-2                                        |
| ILMN_2717117 | 4930546H06Rik | Mus musculus RIKEN cDNA 4930546H06 gene (4930546H06Rik), mRNA                    | 231        | 379     | 0.01644 | -1.6        | NM_029205.2      | B230206P06Rik                                                               |
| ILMN_2599615 | Ergic3        | Mus musculus ERGIC and golgi 3 (Ergic3), mRNA                                    | 1204       | 1976    | 0.00133 | -1.6        | NM_025516.4      | NY-BR-84; 2310015B14Rik; DKFZp547A2190; CGI-54; D2Ucla1; Sdbcag84; AV318804 |
| ILMN_1221943 | Sdf2l1        | Mus musculus stromal cell-derived factor 2-like 1 (Sdf2l1), mRNA                 | 828        | 1357    | 0.00269 | -1.6        | NM_022324.2      |                                                                             |
| ILMN_1215791 | Alox5ap       |                                                                                  | 532        | 872     | 0.01399 | -1.6        | NM_009663        |                                                                             |
| ILMN_1225673 | Ccnd1         | Mus musculus cyclin D1 (Ccnd1), mRNA                                             | 538        | 879     | 0.00603 | -1.6        | NM_007631.2      | AI327039; PRAD1; bcl-1; Cyl-1                                               |
| ILMN_2741277 | Snurf         | Mus musculus SNRPN upstream reading frame (Snurf), mRNA                          | 1873       | 3062    | 0.04706 | -1.6        | NM_033174.2      | Snrnp; MGC18604; MGC30325; 2410045I01Rik                                    |
| ILMN_2636360 | Scotin        | Mus musculus scotin gene (Scotin), transcript variant 2, mRNA                    | 518        | 844     | 0.02698 | -1.6        | NM_026381.3      | 6430628I05Rik; 2310008D10Rik                                                |
| ILMN_1227414 | 3010022N24Rik |                                                                                  | 85         | 137     | 0.02077 | -1.6        | XM_149833.1      |                                                                             |
| ILMN_2713285 | Fhl1          | Mus musculus four and a half LIM domains 1 (Fhl1), transcript variant 1, mRNA    | 861        | 1395    | 0.02342 | -1.6        | NM_001077361.1   | KyoT                                                                        |
| ILMN_2774491 | 1700065A05Rik |                                                                                  | 115        | 186     | 0.00302 | -1.6        | XM_283972        |                                                                             |
| ILMN_1223875 | Rasd2         | PREDICTED: Mus musculus RASD family, member 2 (Rasd2), mRNA                      | 775        | 1243    | 0.00002 | -1.6        | XM_204287.8      |                                                                             |
| ILMN_2636339 | Isgf3g        | Mus musculus interferon dependent positive acting transcription factor 3 gamma   | 252        | 404     | 0.01043 | -1.6        | NM_008394.2      | Irf-9; p48                                                                  |
| ILMN_1227212 | 2810403A07Rik | Mus musculus RIKEN cDNA 2810403A07 gene (2810403A07Rik), mRNA                    | 1409       | 2255    | 0.00037 | -1.6        | NM_028814.2      | AI451678; AI256352; A430106P18Rik                                           |
| ILMN_1257756 | Cbs           | Mus musculus cystathionine beta-synthase (Cbs), transcript variant 1, mRNA       | 229        | 366     | 0.04465 | -1.6        | NM_144855.2      | MGC37300; MGC18895; AI047524; AI303044; MGC18856; HIP4                      |
| ILMN_1242833 | Kif12         | Mus musculus kinesin family member 12 (Kif12), mRNA                              | 616        | 980     | 0.04481 | -1.6        | NM_010616.2      |                                                                             |
| ILMN_2484147 | Tro           | Mus musculus trophinin (Tro), transcript variant 1, mRNA                         | 99         | 157     | 0.01561 | -1.6        | NM_001002272.2   | Maged3l; Maged3; Tnn; maophinin; AA409408; Trol                             |
| ILMN_2756226 | C630025L14    |                                                                                  | 615        | 975     | 0.00453 | -1.6        | NM_172489.1      |                                                                             |
| ILMN_2742160 | H13           | Mus musculus histocompatibility 13 (H13), mRNA                                   | 1656       | 2618    | 0.03204 | -1.6        | NM_010376.3      | Spp; H-13; AV020344; 4930443L17Rik; 1200006O09Rik; 5031424B04Rik; PSL3      |
| ILMN_1220813 | Dtx3l         | Mus musculus delfx 3-like (Drosophila) (Dtx3l), mRNA                             | 511        | 805     | 0.00004 | -1.6        | NM_001013371.2   | MGC102362; BC023741; AU042200                                               |
| ILMN_2608043 | Hes6          | Mus musculus hairy and enhancer of split 6 (Drosophila) (Hes6), mRNA             | 304        | 479     | 0.00640 | -1.6        | NM_019479.3      | AI326893                                                                    |
| ILMN_1246073 | Lefty1        | Mus musculus left right determination factor 1 (Lefty1), mRNA                    | 315        | 494     | 0.00430 | -1.6        | NM_010094.3      | lefty; Stra3; lefty-1; Leftb; AI450052; Tqfb4                               |
| ILMN_1217584 | Tubb5         | Mus musculus tubulin, beta 5 (Tubb5), mRNA                                       | 1040       | 1626    | 0.00498 | -1.6        | NM_011655.4      | AI596182; M(beta)5; AA408537; B130022C14Rik                                 |

|              |               |                                                                                    |      |       |         |      |                |                                                                                  |
|--------------|---------------|------------------------------------------------------------------------------------|------|-------|---------|------|----------------|----------------------------------------------------------------------------------|
| ILMN_1255363 | Fkbp14        | Mus musculus FK506 binding protein 14 (Fkbp14), mRNA                               | 373  | 578   | 0.03989 | -1.6 | NM_153573.1    | BC029109: MGC18737: FkBP22                                                       |
| ILMN_2702703 | Shmt2         | Mus musculus serine hydroxymethyltransferase 2 (mitochondrial) (Shmt2), mRNA       | 220  | 341   | 0.04031 | -1.6 | NM_028230.3    | 2700043D08Rik: AA408223: AA986903                                                |
| ILMN_1220508 | 1110018J23Rik |                                                                                    | 308  | 478   | 0.01145 | -1.6 | XM_140742.4    |                                                                                  |
| ILMN_1245037 | Ngef          |                                                                                    | 73   | 113   | 0.00245 | -1.5 | NM_019867      |                                                                                  |
| ILMN_2614644 | 5730406M06Rik | PREDICTED: Mus musculus RIKEN cDNA 5730406M06 gene, transcript variant 32          | 464  | 716   | 0.00239 | -1.5 | XM_920534.2    |                                                                                  |
| ILMN_2641217 | Sult1d1       | Mus musculus sulfotransferase family 1D, member 1 (Sult1d1), mRNA                  | 186  | 286   | 0.01433 | -1.5 | NM_016771.2    | 5033411P13Rik: AI987815: Sultn: ST1d1: SULT-N                                    |
| ILMN_2737517 | Cik4          | Mus musculus CDC like kinase 4 (Cik4), mRNA                                        | 409  | 629   | 0.00042 | -1.5 | NM_007714.4    | AI987988: C85119                                                                 |
| ILMN_2730116 | Coq10b        | Mus musculus coenzyme Q10 homolog B (S. cerevisiae) (Coq10b), transcript variant   | 655  | 1008  | 0.02966 | -1.5 | NM_026424.3    | 1700030I21Rik: AW742641: AV002237: 9530077A17Rik: 1500041J02Rik                  |
| ILMN_2630641 | Srm           | Mus musculus spermidine synthase (Srm), mRNA                                       | 1335 | 2051  | 0.00231 | -1.5 | NM_009272.4    | SppSy: AA407669                                                                  |
| ILMN_2670959 | Snrp70        | Mus musculus U1 small nuclear ribonucleoprotein polypeptide A (Snrp70), mRNA       | 307  | 471   | 0.00400 | -1.5 | NM_009224.4    | RnuIp70: R74807: 70kDa: 3200002N22Rik: Srp70: SNRNP70: 2700022N21Rik: U1-70      |
| ILMN_2746664 | Slc22a17      | Mus musculus solute carrier family 22 (organic cation transporter), member 17      | 161  | 246   | 0.00236 | -1.5 | NM_021551.3    | BOIT: Bcct: mBOCT: AW555662: AU041908: 1700094C23Rik                             |
| ILMN_2517290 | Impact        | Mus musculus imprinted and ancient (Impact), mRNA                                  | 339  | 516   | 0.03726 | -1.5 | NM_008378.2    | E430016J11Rik                                                                    |
| ILMN_2629329 | Mcf2l         | Mus musculus mcf 2 transforming sequence-like (Mcf2l), mRNA                        | 152  | 230   | 0.03626 | -1.5 | NM_178076.2    | mKIAA0362: Ost: C130040G20Rik: Ost gamma: Dbs                                    |
| ILMN_2760765 | BC021381      | Mus musculus cDNA sequence BC021381 (BC021381), mRNA                               | 244  | 371   | 0.00156 | -1.5 | NM_145382.3    | MGC29235: MGC38018: MGC39032                                                     |
| ILMN_2706034 | BC037393      | Mus musculus cDNA sequence BC037393 (BC037393), mRNA                               | 114  | 172   | 0.00078 | -1.5 | NM_201369.2    | MGC25830                                                                         |
| ILMN_1237435 | Aox1          | Mus musculus aldehyde oxidase 1 (Aox1), mRNA                                       | 528  | 800   | 0.02065 | -1.5 | NM_009676.2    | Ro: Ao: MGC13774: AI255253: Aox2: Moro: AI196512: Aox-1: Aox-2                   |
| ILMN_1247017 | Tnrc15        | Mus musculus trinucleotide repeat containing 15 (Tnrc15), mRNA                     | 137  | 207   | 0.05002 | -1.5 | NM_146112.3    | AB30080H02Rik: AW259676: 2610016F01Rik: BC006835: Gigyf2: MGC38689: AI852361     |
| ILMN_2638778 | 3300001P08Rik | Mus musculus RIKEN cDNA 3300001P08 gene (3300001P08Rik), mRNA                      | 1269 | 1910  | 0.00051 | -1.5 | NM_026313.1    | Luc7a: RP23-244C22.4                                                             |
| ILMN_1247334 | Usp52         | Mus musculus ubiquitin specific peptidase 52 (Usp52), mRNA                         | 132  | 198   | 0.00147 | -1.5 | NM_133992.2    | AW742773: AI047843: 1200014O24Rik: mKIAA0710                                     |
| ILMN_1214329 | Scotin        | Mus musculus scotin gene (Scotin), transcript variant 1, mRNA                      | 173  | 261   | 0.03965 | -1.5 | NM_025858.2    | 6430628I05Rik: mShisa5: 2310008D10Rik                                            |
| ILMN_2747456 | Ivns1abp      | Mus musculus influenza virus NS1A binding protein (Ivns1abp), transcript variant   | 1654 | 2484  | 0.00800 | -1.5 | NM_054102.2    | 1700126I16Rik: Nd1-L: 1190004M08Rik: Nd1-S: NS1-BP: NS-1: ND1: HSPC068: AA960440 |
| ILMN_1243734 | 5730407K14Rik |                                                                                    | 124  | 185   | 0.00169 | -1.5 | XM_355366.1    |                                                                                  |
| ILMN_2626235 | Lgals4        | Mus musculus lectin, galactose binding, soluble 4 (Lgals4), mRNA                   | 105  | 157   | 0.00050 | -1.5 | NM_010706.1    | galectin-4                                                                       |
| ILMN_1247078 | Ogt           | Mus musculus O-linked N-acetylglucosamine (GlcNAc) transferase                     | 130  | 194   | 0.00921 | -1.5 | NM_139144.2    | 1110038P24Rik: 4831420N21Rik: AI115525                                           |
| ILMN_2588663 | Txndc11       | Mus musculus thioredoxin domain containing 11 (Txndc11), transcript variant 1      | 160  | 239   | 0.01327 | -1.5 | NM_029582.2    | 2810408E11Rik: Txdc11: EFP1: AI427833                                            |
| ILMN_2589525 | Cpeb3         | Mus musculus cytoplasmic polyadenylation element binding protein 3 (Cpeb3), mRNA   | 67   | 100   | 0.04122 | -1.5 | NM_198300.2    | KIAA0940: mKIAA0940: 4831440I18Rik                                               |
| ILMN_1257968 | Arfgap1       | Mus musculus ADP-ribosylation factor GTPase activating protein 1 (Arfgap1), mRNA   | 332  | 495   | 0.02403 | -1.5 | NM_145760.2    | Arf1gap: AI115377                                                                |
| ILMN_2599154 | Oasl2         | Mus musculus 2'-5' oligoadenylate synthetase-like 2 (Oasl2), mRNA                  | 91   | 136   | 0.00688 | -1.5 | NM_011854.2    | Mmu-OASL: Oasl: M1204                                                            |
| ILMN_2628658 | Atp6ap2       | Mus musculus ATPase, H+ transporting, lysosomal accessory protein 2 (Atp6ap2)      | 2563 | 3802  | 0.04142 | -1.5 | NM_027439.3    | M8-9: APT6M8-9: 5730403E06Rik: Atp6ip2: ATP6M8-9                                 |
| ILMN_1242629 | 1600016N20Rik | Mus musculus RIKEN cDNA 1600016N20 gene (1600016N20Rik), mRNA                      | 281  | 417   | 0.00871 | -1.5 | NM_028050.1    |                                                                                  |
| ILMN_2687324 | Col27a1       | Mus musculus procollagen, type XXVII, alpha 1 (Col27a1), mRNA                      | 63   | 93    | 0.00082 | -1.5 | NM_025685.3    | 5730512J02Rik: mKIAA1870: AI449266                                               |
| ILMN_1220875 | Fkbp2         | Mus musculus FK506 binding protein 2 (Fkbp2), mRNA                                 | 4560 | 6747  | 0.02553 | -1.5 | NM_008020.2    | mFKBP2: 13kDa: mFKBP13                                                           |
| ILMN_2656268 | Fmnl2         | Mus musculus formin-like 2 (Fmnl2), mRNA                                           | 1558 | 2303  | 0.03624 | -1.5 | NM_172409.2    | Man: 5430425K04Rik                                                               |
| ILMN_2709891 | Cldn1         | Mus musculus claudin 1 (Cldn1), mRNA                                               | 69   | 101   | 0.02090 | -1.5 | NM_016674.3    | AI596271                                                                         |
| ILMN_1230878 | H2-T10        | Mus musculus histocompatibility 2, T region locus 10 (H2-T10), mRNA                | 328  | 484   | 0.00916 | -1.5 | NM_010395.5    | H-2T10                                                                           |
| ILMN_2704257 | Reln          | Mus musculus reelin (Reln), mRNA                                                   | 89   | 132   | 0.01726 | -1.5 | NM_011261.2    | reeler: rl                                                                       |
| ILMN_2634621 | Parp14        |                                                                                    | 307  | 452   | 0.00104 | -1.5 | NM_145481.1    |                                                                                  |
| ILMN_1239648 | Tmed4         | Mus musculus transmembrane emp24 protein transport domain containing 4 (Tmed4)     | 1608 | 2368  | 0.02110 | -1.5 | NM_134020.1    | 1110014L17Rik: RP23-198N14.6: AI326346                                           |
| ILMN_2732816 | LOC674135     | PREDICTED: Mus musculus similar to HLA-G protein (LOC674135), misc RNA             | 9567 | 14087 | 0.03917 | -1.5 | XR_004604.2    |                                                                                  |
| ILMN_1236888 | Rangap1       |                                                                                    | 208  | 307   | 0.03490 | -1.5 | NM_011241      |                                                                                  |
| ILMN_2662036 | 1700113I22Rik | Mus musculus RIKEN cDNA 1700113I22 gene (1700113I22Rik), mRNA                      | 73   | 107   | 0.00571 | -1.5 | NM_026865.2    | 1110069E20Rik                                                                    |
| ILMN_2645045 | ErbB2ip       | Mus musculus ErbB2 interacting protein (ErbB2ip), transcript variant 1, mRNA       | 86   | 127   | 0.00340 | -1.5 | NM_001005868.1 | Erbin: 1700028E05Rik: mKIAA1225                                                  |
| ILMN_1241071 | Safb2         | Mus musculus scaffold attachment factor B2 (Safb2), mRNA                           | 127  | 186   | 0.00766 | -1.5 | NM_001029979.2 | AA389433: mKIAA0138: AI255170                                                    |
| ILMN_2424937 | Tnrc6a        | Mus musculus trinucleotide repeat containing 6a (Tnrc6a), mRNA                     | 930  | 1367  | 0.05072 | -1.5 | NM_144925.3    | GW182: D130023A07Rik: Tnrc6: MGC11932: 2010321I05Rik: CAGH26: 3110054G10Rik      |
| ILMN_2629165 | 2410004N11Rik |                                                                                    | 221  | 325   | 0.01120 | -1.5 | NM_025888.2    |                                                                                  |
| ILMN_1229455 | Rnf213        | Mus musculus ring finger protein 213 (Rnf213), mRNA                                | 686  | 1007  | 0.02000 | -1.5 | NM_001040005.2 | D11Erd759e: 6030403J01: mKIAA1554                                                |
| ILMN_2700039 | Gbp6          | Mus musculus guanylate binding protein 6 (Gbp6), mRNA                              | 125  | 163   | 0.01267 | -1.5 | NM_001083312.1 | Gbp7: 9830147J24Rik                                                              |
| ILMN_1227149 | Gtl2          | Mus musculus GTL2, imprinted maternally expressed untranslated mRNA (Gtl2)         | 92   | 135   | 0.02767 | -1.5 | NM_003633.1    | Meg3: D12Bwg1266e: 3110050O07Rik: AW108224: 2900016C05Rik: 6330408G06Rik         |
| ILMN_2423609 | LOC633360     | PREDICTED: Mus musculus hypothetical LOC633360 (LOC633360), mRNA                   | 132  | 193   | 0.02293 | -1.5 | XM_907756.3    |                                                                                  |
| ILMN_1256671 | Hnrph1        | Mus musculus heterogeneous nuclear ribonucleoprotein H1 (Hnrph1), mRNA             | 1639 | 2390  | 0.02253 | -1.5 | NM_021510.2    | Hnrph: AI642080: E430005G16Rik                                                   |
| ILMN_2515784 | Tspan6        | Mus musculus tetraspanin 6 (Tspan6), mRNA                                          | 114  | 166   | 0.00742 | -1.5 | NM_019656.3    | AI316786: T245: Tm45f6: TSPAN-6: 6720473L21Rik: MGC117923: Tm45f                 |
| ILMN_1238649 | Rbm10         | Mus musculus RNA binding motif protein 10 (Rbm10), mRNA                            | 101  | 147   | 0.02174 | -1.5 | NM_145627.1    | E430039K10Rik: mKIAA0122: MGC7826                                                |
| ILMN_2652527 | Ctndd2        | Mus musculus catenin (cadherin associated protein), delta 2 (Ctndd2), mRNA         | 82   | 119   | 0.01437 | -1.5 | NM_008729.2    | Catnd2: Nprap: neurojugin                                                        |
| ILMN_1250172 | 1700019H03Rik | Mus musculus RIKEN cDNA 1700019H03 gene (1700019H03Rik), mRNA                      | 116  | 168   | 0.00880 | -1.5 | NM_183161.3    | MGC28538: BC019537                                                               |
| ILMN_2647873 | Nav1          | Mus musculus neuron navigator 1 (Nav1), mRNA                                       | 1148 | 1667  | 0.02405 | -1.5 | NM_173437.1    | 9930003A20Rik: POMFIL3: mKIAA1151: unc53H1: 9530089B19: C230080M11Rik: steerin-1 |
| ILMN_2717127 | Ddx58         | Mus musculus DEAD (Asp-Glu-Ala-Asp) box polypeptide 58 (Ddx58), mRNA               | 205  | 298   | 0.00568 | -1.5 | NM_172689.3    | C330021E21: 6430573D20Rik: RIG-I                                                 |
| ILMN_2650532 | Tmed3         | Mus musculus transmembrane emp24 domain containing 3 (Tmed3), mRNA                 | 2093 | 3036  | 0.02369 | -1.5 | NM_025360.1    | 1200002G13Rik: P24b: AW546672                                                    |
| ILMN_1213351 | Gsdm1         | Mus musculus gasdermin 1 (Gsdm1), mRNA                                             | 793  | 1063  | 0.00145 | -1.5 | NM_021347.3    | Gsdm: BB149167: H312E: Gsdm1                                                     |
| ILMN_1242333 | Impm2         | Mus musculus IMP2 inner mitochondrial membrane peptidase-like (S. cerevisiae)      | 375  | 544   | 0.01793 | -1.4 | NM_053122.3    | AI853880: IMP2                                                                   |
| ILMN_2699637 | Lsr           | Mus musculus lipolysis stimulated lipoprotein receptor (Lsr), mRNA                 | 222  | 321   | 0.02273 | -1.4 | NM_017405.1    | Lisch7                                                                           |
| ILMN_2746811 | Gpr108        | Mus musculus G protein-coupled receptor 108 (Gpr108), mRNA                         | 466  | 674   | 0.04445 | -1.4 | NM_030084.3    | C79132: AA589464: 1810015L19Rik                                                  |
| ILMN_2604891 | Car11         | Mus musculus carbonic anhydrase 11 (Car11), mRNA                                   | 95   | 137   | 0.00152 | -1.4 | NM_009800.4    |                                                                                  |
| ILMN_2678828 | Eif5a         | Mus musculus eukaryotic translation initiation factor 5A (Eif5a), mRNA             | 2787 | 4021  | 0.02082 | -1.4 | NM_181582.3    | uORF3: MGC6725: uORF2: uORF: D19Wsu54e: AA410058: uORF1: Eif4d                   |
| ILMN_2731563 | Pfkfb3        | Mus musculus 6-phosphofructo-2-kinase/fructose-2,6-bisphosphatase 3 (Pfkfb3), mRNA | 134  | 193   | 0.01315 | -1.4 | NM_133232.2    | iPFK-2: E330010H22Rik                                                            |
| ILMN_2600022 | Heg1          | Mus musculus HEG homolog 1 (zebrafish) (Heg1), transcript variant 2, mRNA          | 76   | 110   | 0.00309 | -1.4 | NM_172934.4    | BC038614: 5530401I02Rik: 4632417D23Rik: 9530025L16Rik: Gm629                     |
| ILMN_2706938 | Ppox          | Mus musculus protoporphyrinogen oxidase (Ppox), mRNA                               | 103  | 148   | 0.00328 | -1.4 | NM_008911.2    | Pco                                                                              |
| ILMN_2685882 | Gdpd3         | Mus musculus glycerophosphodiester phosphodiesterase domain containing 3 (Gdpd3)   | 98   | 141   | 0.01518 | -1.4 | NM_024228.2    | 1110015E22Rik                                                                    |
| ILMN_2735429 | AW146242      | Mus musculus expressed sequence AW146242 (AW146242), mRNA                          | 275  | 394   | 0.01773 | -1.4 | NM_146168.1    |                                                                                  |
| ILMN_1246078 | Safb          | PREDICTED: Mus musculus scaffold attachment factor B, transcript variant 18        | 92   | 132   | 0.01126 | -1.4 | XM_924956.2    |                                                                                  |
| ILMN_2655005 | Wnk1          | Mus musculus WNK lysine deficient protein kinase 1 (Wnk1), mRNA                    | 92   | 132   | 0.00146 | -1.4 | NM_198703.1    | Prkwnk1: mKIAA0344: 6430573H23Rik                                                |
| ILMN_1228073 | Pib5pa        | Mus musculus phosphatidylinositol (4,5) bisphosphate 5-phosphatase, A (Pib5pa)     | 470  | 674   | 0.03508 | -1.4 | NM_172439.2    | Pipp                                                                             |
| ILMN_1253354 | Dapp1         | Mus musculus dual adaptor for phosphotyrosine and 3-phosphoinositides 1 (Dapp1)    | 154  | 221   | 0.03805 | -1.4 | NM_011932.2    | Bam32                                                                            |
| ILMN_2605249 | Rab9b         | Mus musculus RAB9B, member RAS oncogene family (Rab9b), mRNA                       | 279  | 399   | 0.01077 | -1.4 | NM_176971.2    | MGC130383: 9330195C02Rik                                                         |
| ILMN_2632519 | Wdr90         | PREDICTED: Mus musculus WD repeat domain 90, transcript variant 1 (Wdr90), mRNA    | 213  | 305   | 0.03862 | -1.4 | XM_001479840.1 |                                                                                  |
| ILMN_1221102 | Arl5a         | Mus musculus ADP-ribosylation factor-like 5A (Arl5a), mRNA                         | 241  | 344   | 0.00974 | -1.4 | NM_182994.2    | T25534: AW610751: 2410015N24Rik: Arl5: 2810410P22Rik: AA408731                   |
| ILMN_1233402 | LOC100045981  | PREDICTED: Mus musculus similar to synaptotagmin XI (LOC100045981), mRNA           | 2525 | 3598  | 0.00004 | -1.4 | XM_001475298.1 |                                                                                  |
| ILMN_1251732 | Dad1          | Mus musculus defender against cell death 1 (Dad1), mRNA                            | 8880 | 12649 | 0.00962 | -1.4 | NM_010015.3    | AI323713                                                                         |
| ILMN_1238119 | Itgav         | Mus musculus integrin alpha V (Itgav), mRNA                                        | 221  | 314   | 0.02976 | -1.4 | NM_008402.1    | 1110004F14Rik: 2610028E01Rik: CD51: D430040G12Rik                                |
| ILMN_1256371 | Fez1          | Mus musculus fasciculation and elongation protein zeta 1 (zyglin I) (Fez1), mRNA   | 787  | 1119  | 0.00745 | -1.4 | NM_183171.1    | UNC-76: UNC76: MGC19293                                                          |
| ILMN_2635791 | LOC675296     | PREDICTED: Mus musculus similar to RIKEN cDNA 9230105E10 gene (LOC675296), mRNA    | 125  | 178   | 0.01402 | -1.4 | XM_001476206.1 |                                                                                  |
| ILMN_2698911 | Tmem59l       | Mus musculus transmembrane protein 59-like (Tmem59l), mRNA                         | 186  | 265   | 0.00801 | -1.4 | NM_182991.2    | 5330410G16Rik                                                                    |
| ILMN_1216416 | Rnf6          | Mus musculus ring finger protein (C3H2C3 type 6) (Rnf6), mRNA                      | 2585 | 3666  | 0.00461 | -1.4 | NM_028774.2    | AA537053: 5730419H05Rik: 1200013I08Rik                                           |
| ILMN_2754866 | Tapbp1        | Mus musculus TAP binding protein-like (Tapbp1), mRNA                               | 940  | 1332  | 0.00128 | -1.4 | NM_145391.1    | BC017613: TAPBPL-R: MGC27679                                                     |
| ILMN_1223308 | Parp9         | Mus musculus poly (ADP-ribose) polymerase family, member 9 (Parp9), mRNA           | 435  | 615   | 0.01410 | -1.4 | NM_030253.2    | MGC7868: Bagl: AW214463: Bal: BC003281                                           |

|              |               |                                                                                  |      |      |         |      |                |                                                                    |
|--------------|---------------|----------------------------------------------------------------------------------|------|------|---------|------|----------------|--------------------------------------------------------------------|
| ILMN_2632196 | Bfar          | Mus musculus bifunctional apoptosis regulator (Bfar), mRNA                       | 270  | 381  | 0.00157 | -1.4 | NM_025976.3    | BAR: AW107665; 3010001A07Rik; A1666707; RNF47                      |
| ILMN_2430275 | Zc3h7a        | Mus musculus zinc finger CCCH type containing 7 A (Zc3h7a), mRNA                 | 222  | 314  | 0.01270 | -1.4 | NM_145931.1    | A1447294; HSPC055; Zc3hdc7; A430104C18Rik; Zc3h7; AW556219         |
| ILMN_2453321 | Zfp179        | Mus musculus zinc finger protein 179 (Zfp179), mRNA                              | 84   | 119  | 0.01861 | -1.4 | NM_009548.2    | bfp; ZNF179; R75574; A1854096                                      |
| ILMN_1249547 | Zfp292        | PREDICTED: Mus musculus zinc finger protein 292, transcript variant 4 (Zfp292)   | 636  | 897  | 0.02217 | -1.4 | XM_909747.3    |                                                                    |
| ILMN_1249759 | Il15ra        | Mus musculus interleukin 15 receptor, alpha chain (Il15ra), transcript variant 2 | 105  | 147  | 0.02125 | -1.4 | NM_133836.1    | AA690181                                                           |
| ILMN_2776910 | Mobk13        | Mus musculus MOB1, Mps One Binder kinase activator-like 3 (yeast) (Mobk13), mRNA | 461  | 650  | 0.03360 | -1.4 | NM_025283.3    | 2610109B12Rik; Prei3                                               |
| ILMN_1221501 | 5730469M10Rik | Mus musculus RIKEN cDNA 5730469M10 gene (5730469M10Rik), mRNA                    | 2046 | 2881 | 0.00407 | -1.4 | NM_027464.3    | AU040822                                                           |
| ILMN_1218368 | Bicd1         | Mus musculus bicaudal D homolog 1 (Drosophila) (Bicd1), mRNA                     | 96   | 136  | 0.02608 | -1.4 | NM_009753.1    | B830009D06Rik; mKIAA4125; KIAA4125                                 |
| ILMN_1222483 | LOC640746     | PREDICTED: Mus musculus similar to tripartite motif protein TRIM34 delta         | 122  | 172  | 0.01348 | -1.4 | XM_917842.2    |                                                                    |
| ILMN_2673233 | Pfkp          | Mus musculus phosphofructokinase, platelet (Pfkp), mRNA                          | 285  | 401  | 0.02554 | -1.4 | NM_019703.3    | PFK-C; 9330125N24Rik; 1200015H23Rik                                |
| ILMN_2630772 | Tceal5        | Mus musculus transcription elongation factor A (SII)-like 5 (Tceal5), mRNA       | 82   | 115  | 0.00335 | -1.4 | NM_177919.1    | 6430401A05Rik                                                      |
| ILMN_2623421 | Hook1         | Mus musculus hook homolog 1 (Drosophila) (Hook1), mRNA                           | 1000 | 1401 | 0.01459 | -1.4 | NM_030014.2    | azh; A930033L17Rik                                                 |
| ILMN_1240566 | Cep170        | Mus musculus centrosomal protein 170 (Cep170), mRNA                              | 123  | 172  | 0.02556 | -1.4 | NM_001099637.1 | A1195353; 4933426L22Rik; A330004A13Rik                             |
| ILMN_2632206 | Gnas          | Mus musculus GNAS (guanine nucleotide binding protein, alpha stimulating)        | 1552 | 2172 | 0.01760 | -1.4 | NM_022000.2    | Gnasxl; P2; PHP1A; P1; GPSA; A930027G11Rik; P3; PHP1B; POH; Oedsm1 |
| ILMN_2722337 | LOC100047223  | PREDICTED: Mus musculus similar to phosphodiesterase 3B (LOC100047223), mRNA     | 526  | 736  | 0.04698 | -1.4 | XM_001477682.1 |                                                                    |
| ILMN_2712507 | 2810455F06Rik |                                                                                  | 710  | 992  | 0.00131 | -1.4 | XM_130011.5    |                                                                    |
| ILMN_2756704 | 9130213B05Rik | Mus musculus RIKEN cDNA 9130213B05 gene (9130213B05Rik), mRNA                    | 175  | 244  | 0.02677 | -1.4 | NM_145562.2    | W91666; 2210012L08Rik                                              |
