# Supplementary material
Source: PubMed Central journal article supplement (PMC2920067)
Supplement: NIHMS213096-supplement-12.pdf [file NIHMS213096-supplement-12.pdf]

Table 2

| Illumina ID  | Symbol        | Definition                                                                         | Mean Clock | Mean WT | P-value | Fold Change | Accession Number | Synonyms                                                                         |
|--------------|---------------|------------------------------------------------------------------------------------|------------|---------|---------|-------------|------------------|----------------------------------------------------------------------------------|
| ILMN_1213920 | Mkrr2         | Mus musculus makorin, ring finger protein, 2 (Mkrr2), mRNA                         | 1487       | 1064    | 0.03097 | 1.4         | NM_023290.2      | 2610002L04Rik; C81377                                                            |
| ILMN_2684300 | Pdcd2l        | Mus musculus programmed cell death 2-like (Pdcd2l), mRNA                           | 1071       | 766     | 0.04970 | 1.4         | NM_026549.3      | 6030457N17Rik; MGC1444595                                                        |
| ILMN_1252845 | Rpo1-1        | Mus musculus RNA polymerase 1-1 (Rpo1-1), mRNA                                     | 211        | 151     | 0.01586 | 1.4         | NM_009085.2      | AL024089; AA409007; 40kDa; RPA40; MGC161175; AA959927                            |
| ILMN_2760226 | BC028440      | Mus musculus cDNA sequence BC028440 (BC028440), mRNA                               | 511        | 364     | 0.02322 | 1.4         | NM_172148.1      | MGC41256                                                                         |
| ILMN_2622804 | Sh3bgrl2      | Mus musculus SH3 domain binding glutamic acid-rich protein like 2 (Sh3bgrl2), mRNA | 116        | 83      | 0.02428 | 1.4         | NM_172507.4      | A930014C21Rik; B930089I21; AA408038                                              |
| ILMN_1224186 | Ica1l         | Mus musculus islet cell autoantigen 1-like (Ica1l), mRNA                           | 185        | 131     | 0.01025 | 1.4         | NM_027407.2      | 1700030B17Rik; Als2cr15                                                          |
| ILMN_2660175 | Fbxo6         | Mus musculus F-box protein 6 (Fbxo6), mRNA                                         | 4754       | 3376    | 0.04925 | 1.4         | NM_015797.3      | Fbxo6b; Fbxo6b; FBG2; AA408845; Fbs2                                             |
| ILMN_2619295 | Bax           | Mus musculus Bcl2-associated X protein (Bax), mRNA                                 | 394        | 280     | 0.00820 | 1.4         | NM_007527.3      |                                                                                  |
| ILMN_2680054 | DOH4S114      | Mus musculus DNA segment, human D4S114 (DOH4S114), mRNA                            | 937        | 664     | 0.00285 | 1.4         | NM_053078.3      | A1325076; PTZ17; SEZ17; P311                                                     |
| ILMN_1235716 | Dtnbp1        | Mus musculus dystrobrevin binding protein 1 (Dtnbp1), mRNA                         | 1871       | 1323    | 0.02639 | 1.4         | NM_025772.4      | AW048963; sdy; 5430437B18Rik; dysbindin                                          |
| ILMN_2755660 | LOC100044779  | PREDICTED: Mus musculus similar to prothymosin alpha (LOC100044779), misc RNA      | 907        | 638     | 0.00527 | 1.4         | XR_030993.1      |                                                                                  |
| ILMN_2620603 | Smyd4         | Mus musculus SET and MYND domain containing 4 (Smyd4), mRNA                        | 160        | 112     | 0.00497 | 1.4         | NM_177009.3      | RP23-384C18.3; G430029E23Rik                                                     |
| ILMN_1254630 | Ptpre         | Mus musculus protein tyrosine phosphatase, receptor type, E (Ptpre), mRNA          | 1856       | 1303    | 0.02489 | 1.4         | NM_011212.3      | PTPe; PTPepsilon                                                                 |
| ILMN_3162143 | 1190007F08Rik | PREDICTED: Mus musculus RIKEN cDNA 1190007F08 gene (1190007F08Rik), misc RNA       | 1390       | 975     | 0.01745 | 1.4         | XR_035126.1      |                                                                                  |
| ILMN_1214952 | Cln3          | Mus musculus ceroid lipofuscinosis, neuronal 3, juvenile (Batten, Spielmeier-Vog)  | 1834       | 1286    | 0.00341 | 1.4         | NM_009907.2      | A1323623                                                                         |
| ILMN_1223313 | Fn3k          | Mus musculus fructosamine 3 kinase (Fn3k), transcript variant 1, mRNA              | 320        | 225     | 0.02013 | 1.4         | NM_022014.2      | 2310074G21Rik                                                                    |
| ILMN_2764309 | Dusp14        | Mus musculus dual specificity phosphatase 14 (Dusp14), mRNA                        | 280        | 196     | 0.00207 | 1.4         | NM_019819.3      | D11Erd3395e; MKP-L; Mkp6; 1110014C10Rik; 2310042C07Rik                           |
| ILMN_1229500 | Gzmm          | Mus musculus granzyme M (lymphocyte met-ase 1) (Gzmm), mRNA                        | 162        | 114     | 0.03800 | 1.4         | NM_008504.2      | MMET-1; Lmet1                                                                    |
| ILMN_1222250 | Rpl21         | Mus musculus ribosomal protein L21 (Rpl21), mRNA                                   | 142        | 99      | 0.00194 | 1.4         | NM_019647.5      | MGC117917; 8430440E03Rik; MGC107026; MGC107587; MGC107588; MGC107690; L21        |
| ILMN_2474858 | Tnfaip2       | Mus musculus tumor necrosis factor, alpha-induced protein 2 (Tnfaip2), mRNA        | 185        | 129     | 0.02805 | 1.4         | NM_009396.1      | Tnfp2; tnf94                                                                     |
| ILMN_2498592 | Ovo2          | Mus musculus ovo-like 2 (Drosophila) (Ovo2), transcript variant A, mRNA            | 110        | 76      | 0.00445 | 1.4         | NM_026924.3      | 1810007D21Rik; Zfp339; 1700108N11Rik; Ovo2; M-OVO-A; movo2; M-OVO-B; MOV0; M-OVO |
| ILMN_2687637 | LOC100046421  | PREDICTED: Mus musculus similar to D4Erd196e protein (LOC100046421), mRNA          | 2450       | 1701    | 0.00872 | 1.4         | XM_001476180.1   |                                                                                  |
| ILMN_2623184 | Nkiras2       | Mus musculus NFKB inhibitor interacting Ras-like protein 2 (Nkiras2), mRNA         | 633        | 436     | 0.00144 | 1.5         | NM_028024.2      | KBRAS2; D630018G21Rik; 2410003M04Rik; 4930527H08Rik                              |
| ILMN_2702605 | Cisd1         | Mus musculus CDGSH iron sulfur domain 1 (Cisd1), mRNA                              | 777        | 535     | 0.02818 | 1.5         | NM_134007.4      | D10Erd214e; AW743335; AU043990; Zcd1; mitoNEET                                   |
| ILMN_1225386 | 2300009A05Rik | PREDICTED: Mus musculus RIKEN cDNA 2300009A05 gene, transcript variant 3           | 1235       | 850     | 0.01789 | 1.5         | XM_898537.2      |                                                                                  |
| ILMN_1229529 | Hsd17b7       | Mus musculus hydroxysteroid (17-beta) dehydrogenase 7 (Hsd17b7), mRNA              | 758        | 519     | 0.00514 | 1.5         | NM_010476.3      | A1266814                                                                         |
| ILMN_2609998 | Fxyd6         | Mus musculus FXYD domain-containing ion transport regulator 6 (Fxyd6), mRNA        | 14284      | 9773    | 0.00130 | 1.5         | NM_022004.6      | O610030I18Rik; Php                                                               |
| ILMN_2663613 | Iitgb5        | Mus musculus integrin beta 5 (Iitgb5), mRNA                                        | 325        | 222     | 0.02747 | 1.5         | NM_010580.1      | [b]5a; AA475909; beta-5; [b]5b; [b]5; ESTM23; A1874634; beta5; [b]-5             |
| ILMN_2641793 | Dtx1          | Mus musculus deltex 1 homolog (Drosophila) (Dtx1), mRNA                            | 156        | 106     | 0.00076 | 1.5         | NM_008052.3      | KIAA4160; Fx1t1; mkIAA4160                                                       |
| ILMN_1255358 | LOC100047712  | PREDICTED: Mus musculus similar to coiled-coil domain containing 101               | 894        | 606     | 0.04300 | 1.5         | XM_001478724.1   |                                                                                  |
| ILMN_2773789 | Par6a         | Mus musculus par-6 (partitioning defective 6.) homolog alpha (C. elegans)          | 561        | 379     | 0.00421 | 1.5         | NM_019695.2      | TAX40; Par6; 0710008C04Rik; Rip-40; PAR6alpha; Par6c; Par-6                      |
| ILMN_2701750 | 2310061J03Rik |                                                                                    | 743        | 502     | 0.03057 | 1.5         | NM_148411.1      |                                                                                  |
| ILMN_2645662 | Tmem86a       | Mus musculus transmembrane protein 86A (Tmem86a), mRNA                             | 499        | 337     | 0.03333 | 1.5         | NM_026436.3      | 1810054O13Rik; AW742698; A1414959                                                |
| ILMN_1233809 | Cmtm7         | Mus musculus CKLF-like MARVEL transmembrane domain containing 7 (Cmtm7), mRNA      | 234        | 158     | 0.00433 | 1.5         | NM_133978.1      | A1481279; Ckifsf7                                                                |
| ILMN_2616522 | Crocc         | Mus musculus ciliary rootlet coiled-coil, rootletin (Crocc), mRNA                  | 182        | 122     | 0.03472 | 1.5         | NM_172122.1      | KIAA0445                                                                         |
| ILMN_2635781 | Rassf4        | Mus musculus Ras association (RalGDS/AF-6) domain family 4 (Rassf4), mRNA          | 661        | 445     | 0.02264 | 1.5         | NM_178045.3      | A1586137; AD037; 3830411C14Rik                                                   |
| ILMN_1219904 | Tspan33       | Mus musculus tetraspanin 33 (Tspan33), mRNA                                        | 536        | 360     | 0.00966 | 1.5         | NM_146173.2      | MGC30714; AI035228; 1300010A20Rik                                                |
| ILMN_1218310 | Piga          | Mus musculus phosphatidylinositol glycan anchor biosynthesis, class A (Piga), mRNA | 502        | 336     | 0.00051 | 1.5         | NM_011081.2      | A1194334; Pig-a                                                                  |
| ILMN_1252204 | Sepw1         | Mus musculus selenoprotein W, muscle 1 (Sepw1), mRNA                               | 554        | 371     | 0.02443 | 1.5         | NM_009156.2      | selW                                                                             |
| ILMN_2744531 | Cygb          | Mus musculus cytoglobin (Cygb), mRNA                                               | 178        | 118     | 0.00808 | 1.5         | NM_030206.3      | 3110001K20Rik; Staap; Hgb                                                        |
| ILMN_2711163 | Ctsk          | Mus musculus cathepsin K (Ctsk), mRNA                                              | 156        | 104     | 0.02752 | 1.5         | NM_007802.3      | MMS10-Q; catK; Ms10q; A1323530                                                   |
| ILMN_1250195 | Ndrg1         | Mus musculus N-myc downstream regulated gene 1 (Ndrg1), mRNA                       | 1537       | 1019    | 0.03449 | 1.5         | NM_008681.2      | CMT4D; Ndr1; CAP43; Ndr1; RTP; PROXY1; NMSL; HMSNL; DRG1; TOD5                   |
| ILMN_2717011 | Bik           | Mus musculus Bcl2-interacting killer (Bik), mRNA                                   | 279        | 185     | 0.02430 | 1.5         | NM_007546.2      | Nbk; Bkl; Bklk                                                                   |
| ILMN_2690460 | Jakmp1        | Mus musculus janus kinase and microtubule interacting protein 1 (Jakmp1), mRNA     | 3713       | 2455    | 0.00615 | 1.5         | NM_178394.3      | Gababrbp; C330021K24Rik; Marlin-1; 5830437M04Rik                                 |
| ILMN_1217767 | Glxr5         | Mus musculus glutaredoxin 5 homolog (S. cerevisiae) (Glxr5), mRNA                  | 4474       | 2954    | 0.01042 | 1.5         | NM_028419.2      | 2900070E19Rik; 2310004O13Rik; AU020725                                           |
| ILMN_1252830 | Mras          | Mus musculus muscle and microspikes RAS (Mras), mRNA                               | 479        | 315     | 0.00401 | 1.5         | NM_008624.3      | A1326250                                                                         |
| ILMN_2693922 | Egfr          | Mus musculus epidermal growth factor receptor (Egfr), transcript variant 1, mRNA   | 658        | 432     | 0.00668 | 1.5         | NM_207655.2      | wa-2; Erbb; 9030024J15Rik; A1552599; Errp; Wa5; wa2                              |
| ILMN_3163006 | Il11re        | Mus musculus interleukin 17 receptor E (Il11re), transcript variant 1, mRNA        | 657        | 423     | 0.00436 | 1.6         | NM_145826.4      | AA589509; IL-17RE                                                                |
| ILMN_2676127 | Scarf2        | Mus musculus scavenger receptor class F, member 2 (Scarf2), mRNA                   | 2001       | 1285    | 0.00526 | 1.6         | NM_153790.2      | W53987; SRECRP-1; Scatf1; Scarf1; Srecl1; SREC-II; W65560; NSR1; A1194363; Srec2 |
| ILMN_1235747 | Sult1c2       | Mus musculus sulfotransferase family, cytosolic, 1C, member 2 (Sult1c2), mRNA      | 1404       | 898     | 0.03962 | 1.6         | NM_026935.4      | 1810008N17Rik; ST1C1; Sult1c1                                                    |
| ILMN_2737738 | Fbxo27        | Mus musculus F-box protein 27 (Fbxo27), mRNA                                       | 328        | 209     | 0.02838 | 1.6         | NM_207238.2      | FBG5; Gm161; E130008B10Rik                                                       |
| ILMN_2773862 | C730025P13Rik | Mus musculus RIKEN cDNA C730025P13 gene (C730025P13Rik), mRNA                      | 335        | 212     | 0.00094 | 1.6         | NM_177344.3      | RP23-132N23.14                                                                   |
| ILMN_1254359 | A230106N23Rik | Mus musculus RIKEN cDNA A230106N23 gene (A230106N23Rik), mRNA                      | 242        | 148     | 0.00083 | 1.6         | NM_177838.2      |                                                                                  |
| ILMN_2648669 | Gpnmb         | Mus musculus glycoprotein (transmembrane) nmb (Gpnmb), mRNA                        | 301        | 184     | 0.04302 | 1.6         | NM_053110.3      | ipd; Dchil                                                                       |
| ILMN_2738345 | Lims2         | Mus musculus LIM and senescent cell antigen like domains 2 (Lims2), mRNA           | 395        | 240     | 0.02648 | 1.6         | NM_144862.3      | PINCH2                                                                           |
| ILMN_2619408 | Atf3          | Mus musculus activating transcription factor 3 (Atf3), mRNA                        | 125        | 75      | 0.03960 | 1.7         | NM_007498.2      | LRG-21                                                                           |
| ILMN_2483304 | Lyve1         | Mus musculus lymphatic vessel endothelial hyaluronan receptor 1 (Lyve1), mRNA      | 409        | 244     | 0.00993 | 1.7         | NM_053247.4      | Lyve-1; Xikd1; Crsbp-1; 1200012G08Rik                                            |
| ILMN_1257251 | Txn14b        | Mus musculus thioredoxin-like 4B (Txn14b), mRNA                                    | 472        | 281     | 0.00401 | 1.7         | NM_175646.2      | DLP; Dim2; D530025J19Rik; A1595343                                               |
| ILMN_2760272 | Rorc          | Mus musculus RAR-related orphan receptor gamma (Rorc), mRNA                        | 274        | 159     | 0.00127 | 1.7         | NM_011281.1      | Nr1f3; RORgamma; Thor; TOR                                                       |
| ILMN_2667091 | Ppp1r3c       | Mus musculus protein phosphatase 1, regulatory (inhibitor) subunit 3C (Ppp1r3c)    | 375        | 214     | 0.00062 | 1.7         | NM_016854.2      | PTG; Rpp1r5                                                                      |
| ILMN_2634083 | Cdkn1a        | Mus musculus cyclin-dependent kinase inhibitor 1A (P21) (Cdkn1a), mRNA             | 2413       | 1369    | 0.01004 | 1.8         | NM_007669.3      | mda6; p21WAF; Waf1; p21Cip1; SDI1; P21; CIP1; CDKI; Cdkn1; CAP20                 |
| ILMN_2611295 | Dusp26        | Mus musculus dual specificity phosphatase 26 (putative) (Dusp26), mRNA             | 1379       | 780     | 0.01308 | 1.8         | NM_025869.3      | 2310043K02Rik; Skrp3                                                             |
| ILMN_1234341 | Gipc2         | Mus musculus GIPC PDZ domain containing family, member 2 (Gipc2), mRNA             | 488        | 269     | 0.00174 | 1.8         | NM_016867.1      | 2200002N01Rik; Serncap2; AU021850                                                |
| ILMN_2707510 | Arntl         | Mus musculus aryl hydrocarbon receptor nuclear translocator-like (Arntl), mRNA     | 226        | 125     | 0.01549 | 1.8         | NM_007489.3      | Bmal1; MOP3; bmal1b; BMAL1b; Arnt3                                               |
| ILMN_1232336 | 1700007K13Rik | Mus musculus RIKEN cDNA 1700007K13 gene (1700007K13Rik), mRNA                      | 227        | 123     | 0.02279 | 1.8         | NM_027040.1      | MGC118342; pierce 1; RP23-430H1.2                                                |
| ILMN_2649773 | Slc38a5       | Mus musculus solute carrier family 38, member 5 (Slc38a5), mRNA                    | 1219       | 653     | 0.02424 | 1.9         | NM_172479.2      | JM24; SN2; E330031E14; C81234                                                    |
| ILMN_1213903 | Hip1r         | Mus musculus huntingtin interacting protein 1 related (Hip1r), mRNA                | 6244       | 3323    | 0.00031 | 1.9         | NM_145070.2      | AA410023; mkIAA0655                                                              |
| ILMN_2754222 | Rpp25         | Mus musculus ribonuclease P 25 subunit (human) (Rpp25), mRNA                       | 815        | 433     | 0.00031 | 1.9         | NM_133982.1      | MGC102363; A1851155                                                              |
| ILMN_2594139 | 6330403K07Rik | Mus musculus RIKEN cDNA 6330403K07 gene (6330403K07Rik), mRNA                      | 378        | 196     | 0.02635 | 1.9         | NM_134022.2      | UGS148; RP23-83113.10; A1415455                                                  |
| ILMN_2647533 | Slc41a3       | Mus musculus solute carrier family 41, member 3 (Slc41a3), transcript variant 1    | 325        | 169     | 0.00048 | 1.9         | NM_027868.2      | SLC41A1-L2; A1480742; T010001P06Rik                                              |
| ILMN_2595732 | LOC100046232  | PREDICTED: Mus musculus similar to NFIL3/E4BP4 transcription factor                | 5140       | 2492    | 0.00048 | 2.1         | XM_001475817.1   |                                                                                  |
| ILMN_1252076 | Lyzs          | Mus musculus lysozyme (Lyzs), mRNA                                                 | 257        | 122     | 0.05059 | 2.1         | NM_017372.3      | Lys; Lzm; Lzp; Lzm-s1; A1326280                                                  |
| ILMN_1238215 | Ctcf          |                                                                                    | 243        | 110     | 0.03190 | 2.2         | NM_010217        |                                                                                  |
| ILMN_2685306 | Lad1          | Mus musculus laminin (Lad1), mRNA                                                  | 334        | 151     | 0.00077 | 2.2         | NM_133664.3      |                                                                                  |
| ILMN_2712120 | S100a6        | Mus musculus S100 calcium binding protein A6 (calcyclin) (S100a6), mRNA            | 3641       | 1528    | 0.00853 | 2.4         | NM_011313.2      | 2A9; Cacy; PRA; CALCYCLIN; 5B10                                                  |
| ILMN_1238547 | Areg          | Mus musculus amphiregulin (Areg), mRNA                                             | 475        | 180     | 0.04013 | 2.6         | NM_009704.3      | Sdgr; AR                                                                         |
| ILMN_2684371 | LOC100047628  | PREDICTED: Mus musculus similar to Chain L, Structural Basis Of Antigen Mimicry    | 691        | 81      | 0.00005 | 8.5         | XM_001476703.1   |                                                                                  |
| ILMN_2635272 | Igh-VJ558     | PREDICTED: Mus musculus immunoglobulin heavy chain (J558 family) (Igh-VJ558), mRNA | 913        | 62      | 0.00010 | 14.7        | XM_001472091.1   |                                                                                  |
