# Supplementary material
Source: PubMed Central journal article supplement (PMC2920067)
Supplement: NIHMS213096-supplement-13.pdf [file NIHMS213096-supplement-13.pdf]

Table 3

|                         | <i>Bmal<sup>flx/flx</sup></i> |             | <i>PdxCre</i>  |             | <i>PdxCre;Bmal<sup>flx/flx</sup></i> |                          |
|-------------------------|-------------------------------|-------------|----------------|-------------|--------------------------------------|--------------------------|
|                         | <i>Light</i>                  | <i>Dark</i> | <i>Light</i>   | <i>Dark</i> | <i>Light</i>                         | <i>Dark</i>              |
| <b>Free Fatty Acids</b> | <i>n=10-13</i>                | <i>n=10</i> | <i>n=10-13</i> | <i>n=10</i> | <i>n=10</i>                          | <i>n=8-10</i>            |
| <i>fasting</i>          | 0.97±0.07                     | 0.75±0.05   | 1.05±0.08      | 0.79±0.06   | 1.03±0.06                            | 0.85±0.08                |
| <i>ad lib</i>           | 0.64±0.06                     | 0.57±0.04   | 0.72±0.07      | 0.55±0.07   | 0.64±0.05                            | 0.46±0.05                |
| <b>Triglycerides</b>    | <i>n=6</i>                    | <i>n=6</i>  | <i>n=5-6</i>   | <i>n=6</i>  | <i>n=5-6</i>                         | <i>n=4</i>               |
| <i>fasting</i>          | 130.4±11.4                    | 59.8±3.8    | 132.0±15.0     | 51.7±5.0    | 170.0±24.2                           | 68.9±8.2                 |
| <i>ad lib</i>           | 123.4±19.2                    | 154.3±22.2  | 98.9±12.1      | 112.6±8.7   | 109.5±14.9                           | 180.2±21.2 <sup>†</sup>  |
| <b>Glucose</b>          | <i>n=8</i>                    | <i>n=11</i> | <i>n=8</i>     | <i>n=14</i> | <i>n=8</i>                           | <i>n=7</i>               |
| <i>fasting</i>          | 79.0±4.7                      | 89.0±4.1    | 81.1±7.4       | 100.3±6.8   | 94.3±6.6                             | 144.0±14.2 <sup>*†</sup> |
