# Supplementary material
Source: PubMed Central journal article supplement (PMC2920067)

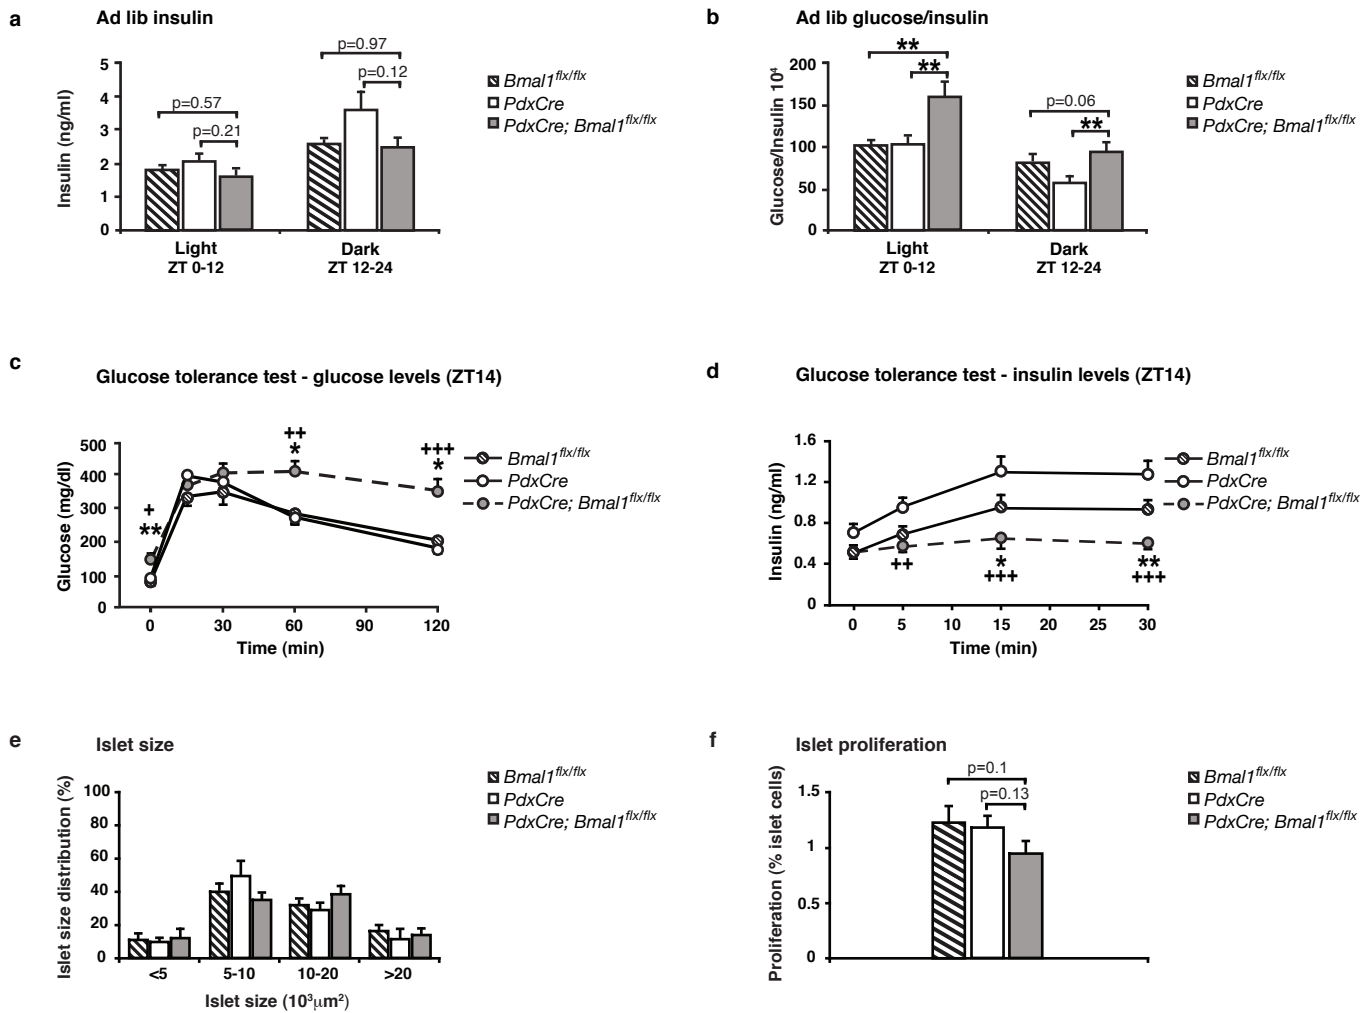

Supplement: NIHMS213096-supplement-10.pdf [file NIHMS213096-supplement-10.pdf]

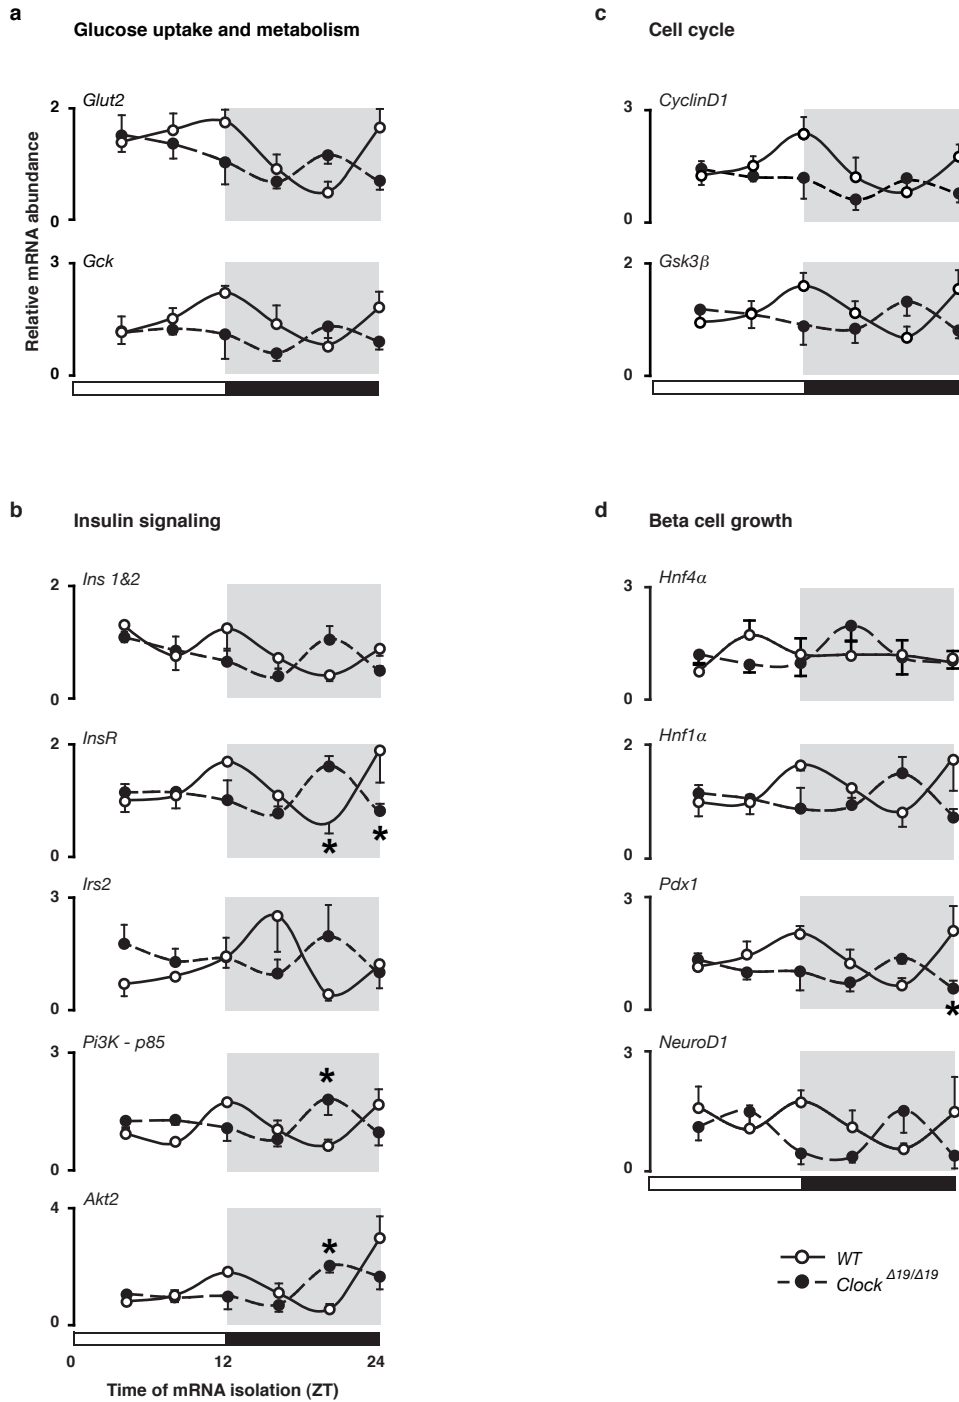

Supplement: NIHMS213096-supplement-2.pdf [file NIHMS213096-supplement-2.pdf]

## Metabolic gene expression in the liver

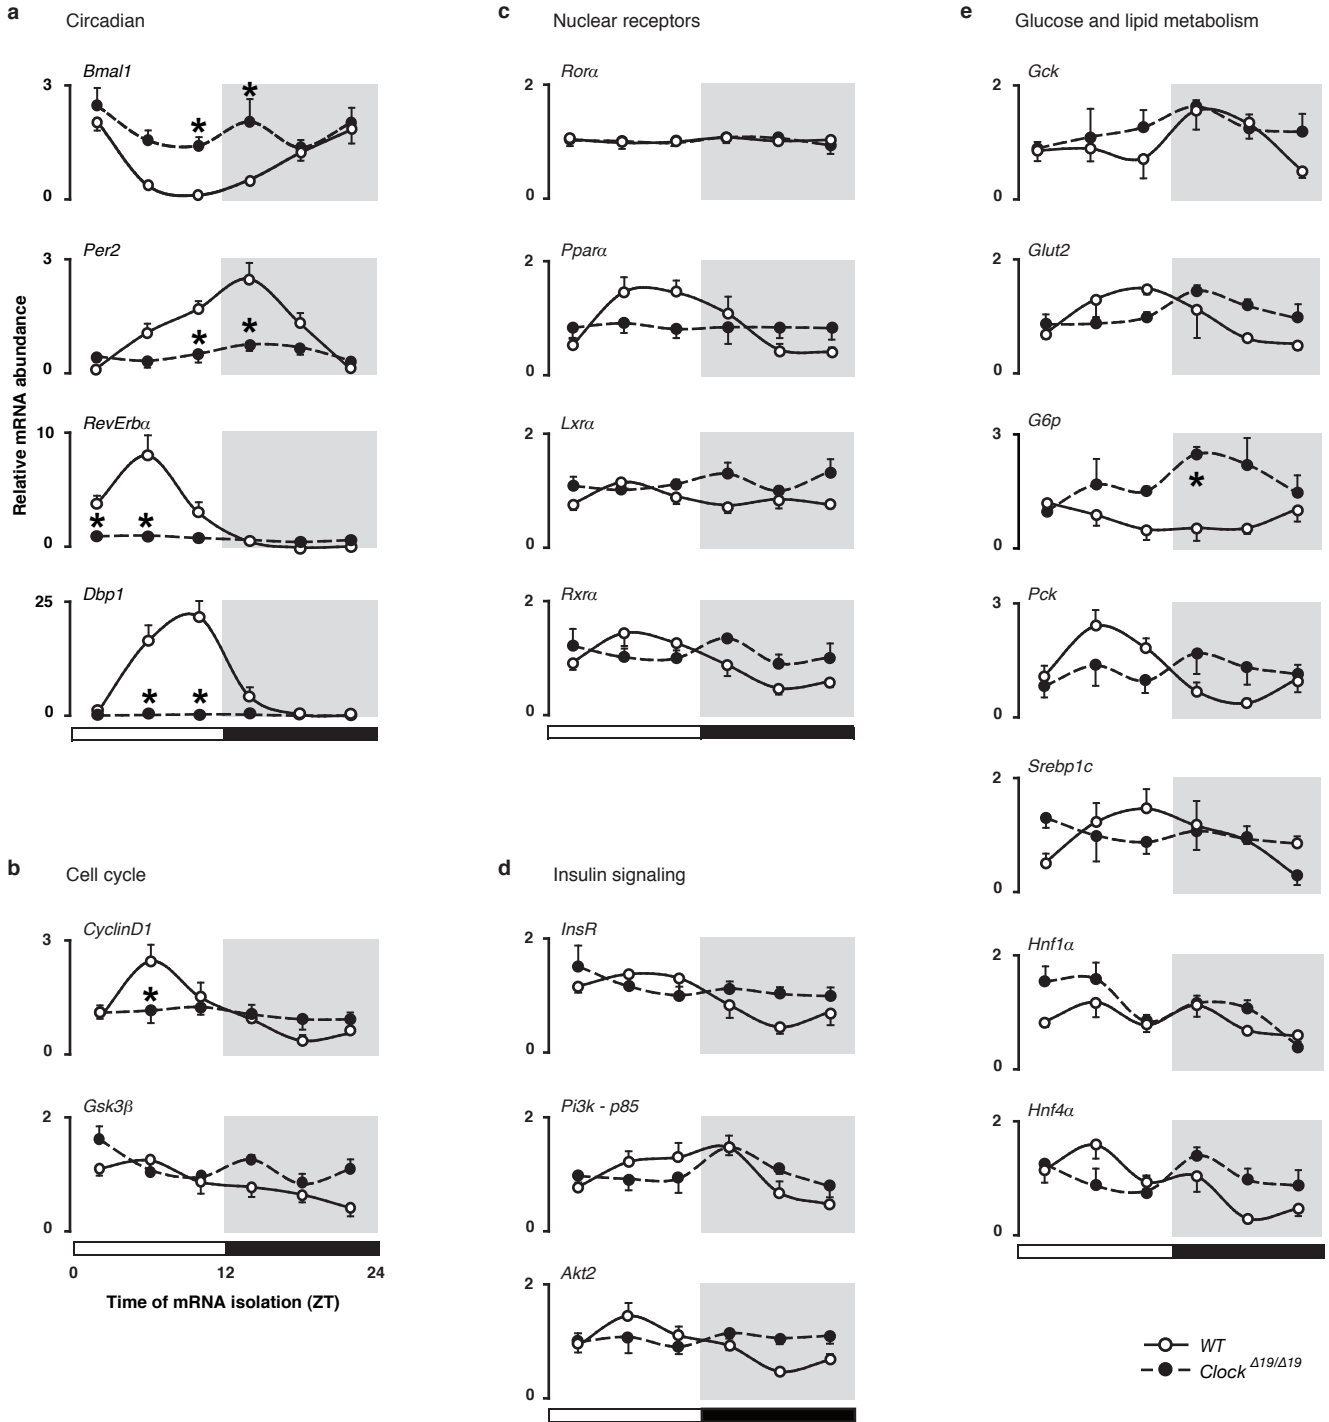

Supplement: NIHMS213096-supplement-3.pdf [file NIHMS213096-supplement-3.pdf]

8mo of age

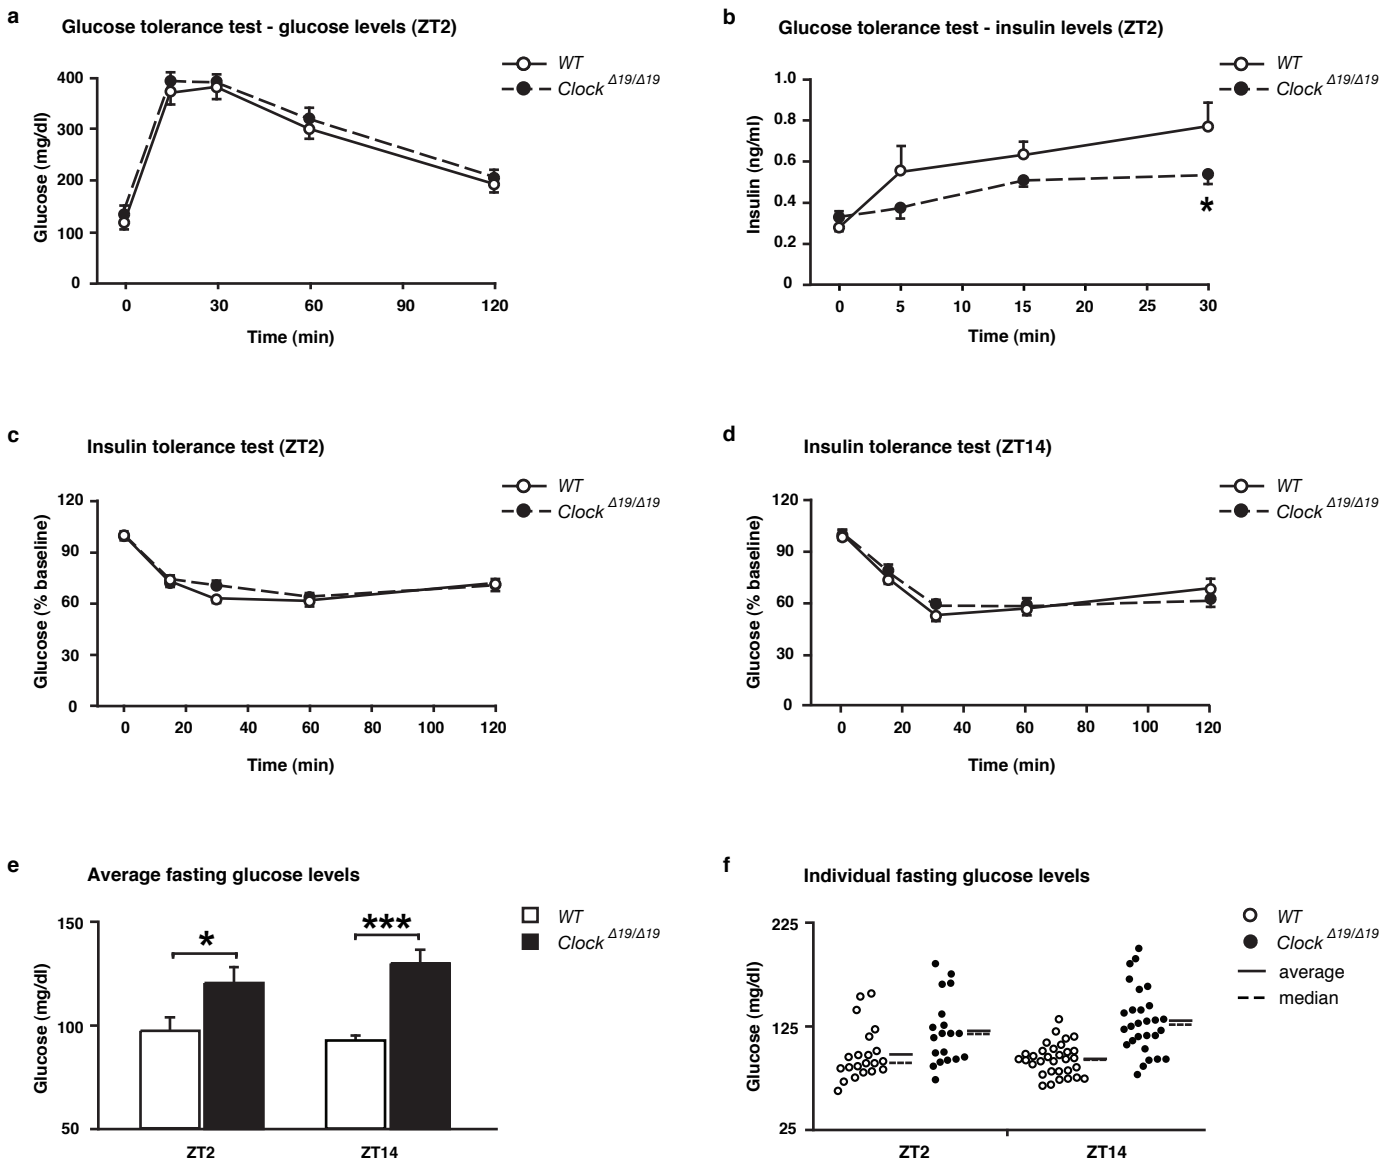

Supplement: NIHMS213096-supplement-4.pdf [file NIHMS213096-supplement-4.pdf]

# Figure S7

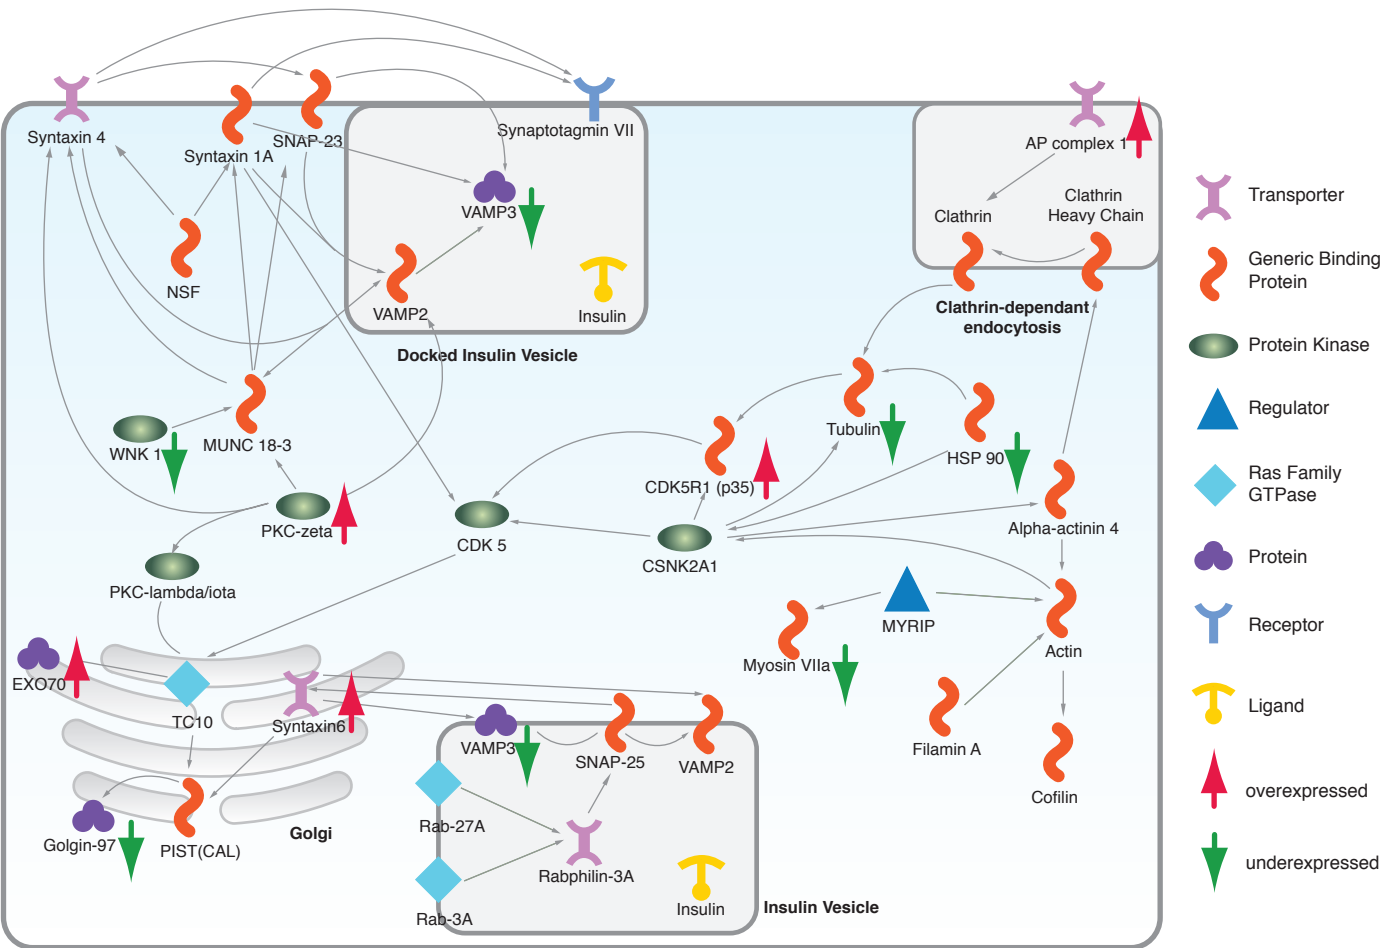

Supplement: NIHMS213096-supplement-8.pdf [file NIHMS213096-supplement-8.pdf]

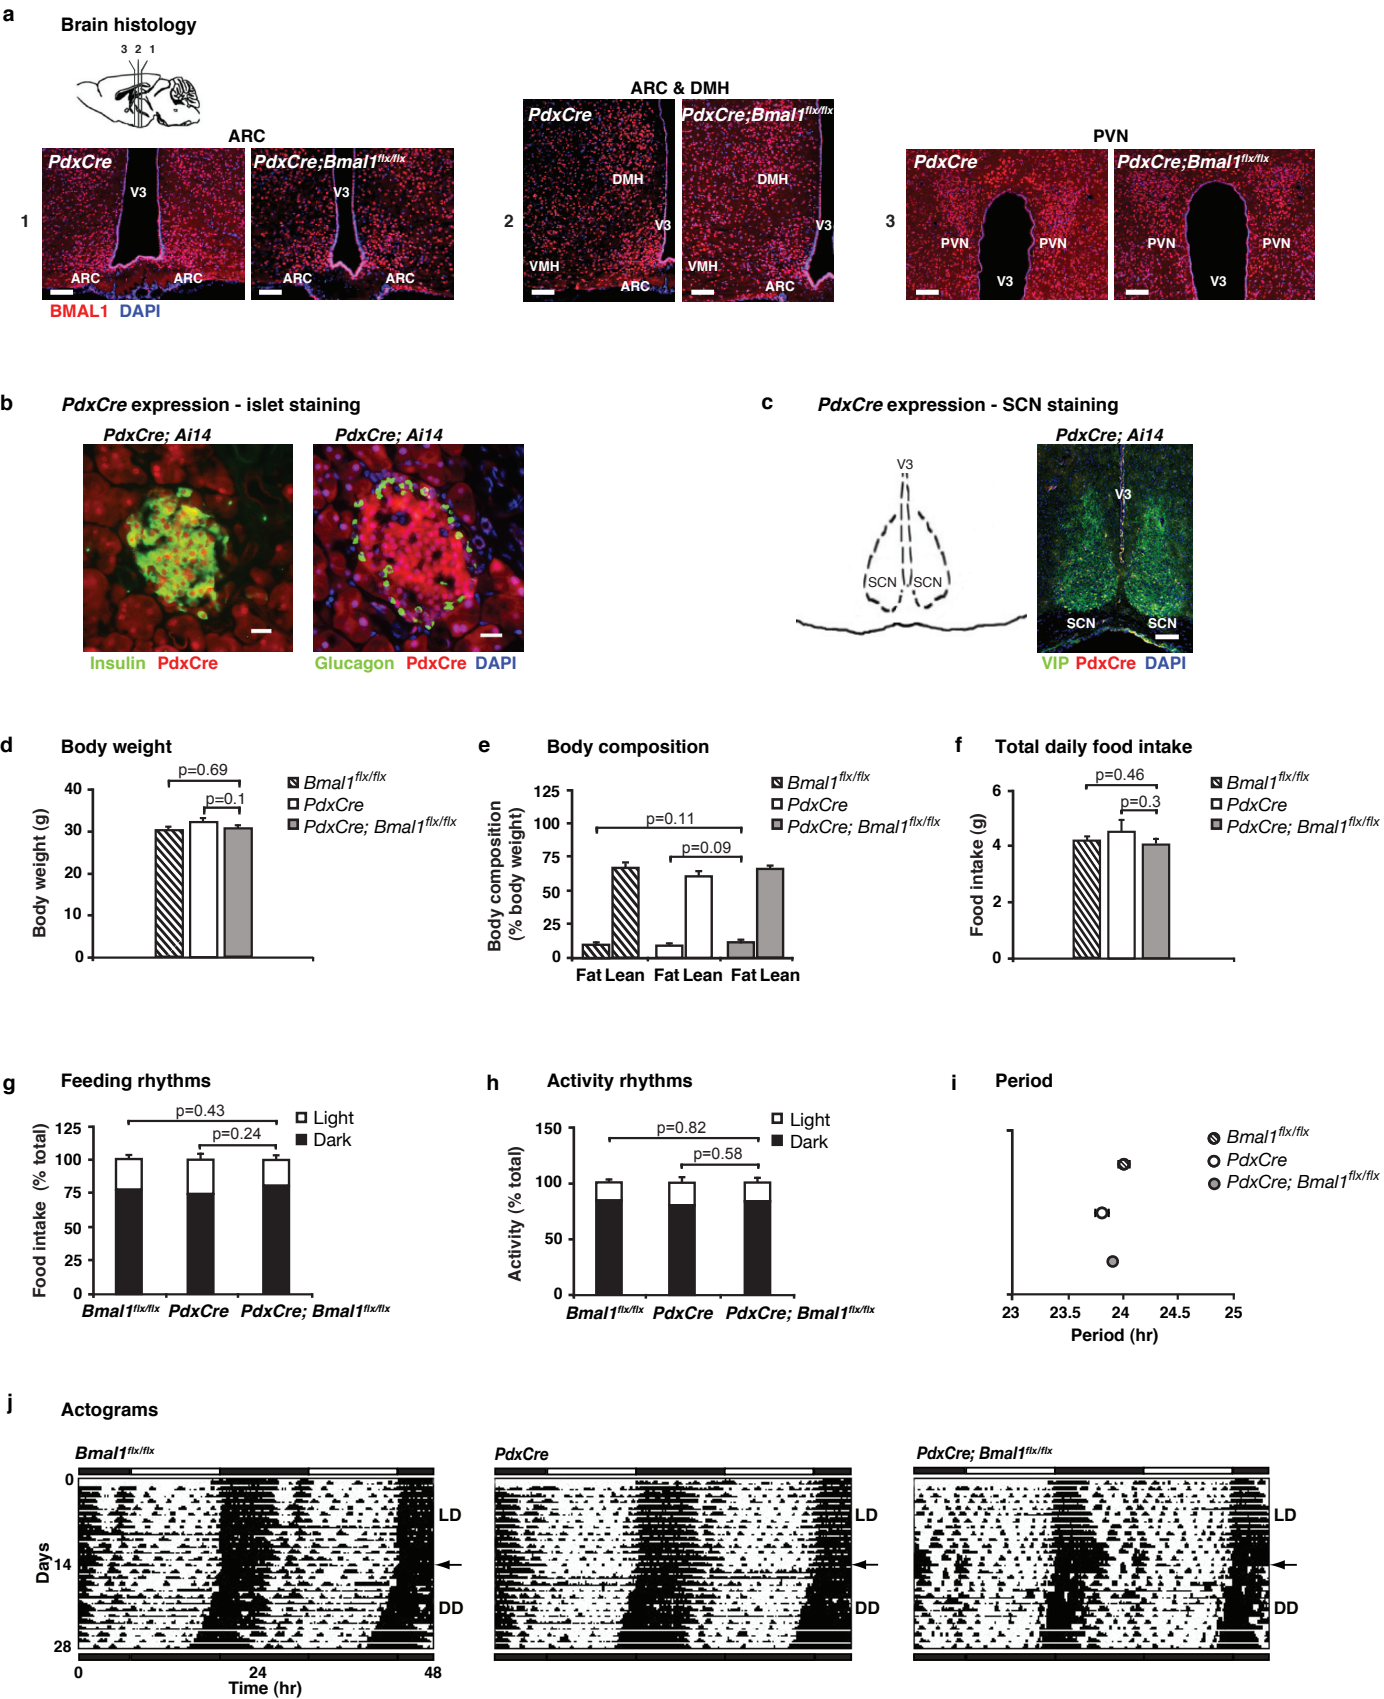

Supplement: NIHMS213096-supplement-9.pdf [file NIHMS213096-supplement-9.pdf]
